# Supplementary material for: Sustained Type I interferon signaling as a mechanism of resistance to PD-1 blockade
Source: PubMed Central journal article supplement (PMC6796942; doi:10.1038/s41422-019-0224-x), 2019-09-03
Supplement: 41422_2019_224_MOESM1_ESM.pdf [file 41422_2019_224_MOESM1_ESM.pdf]

Figure S1

a

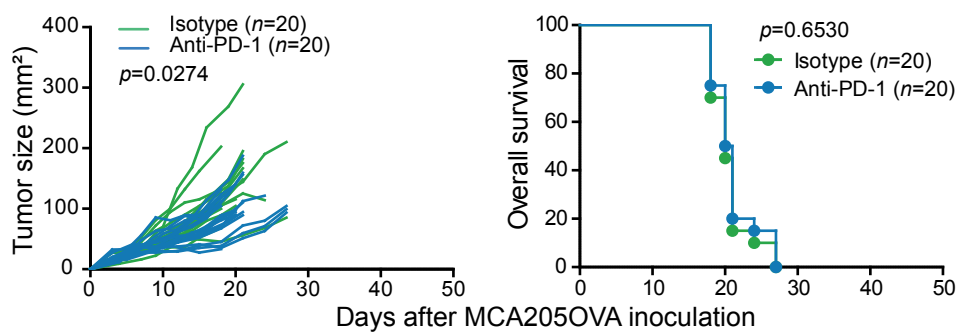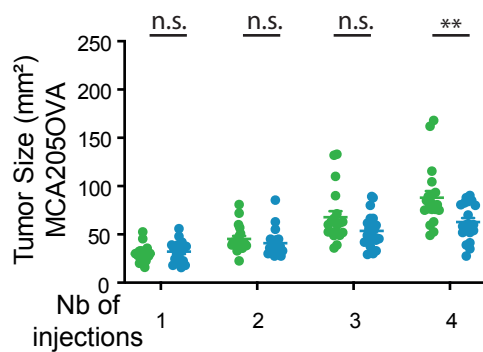

b

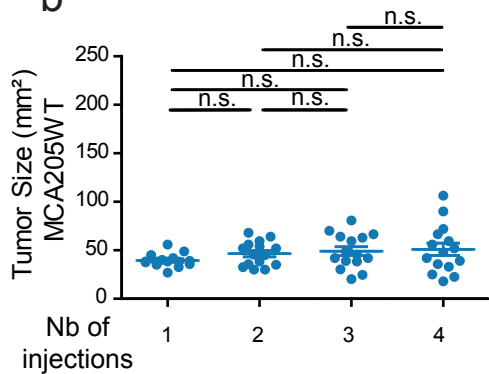

c

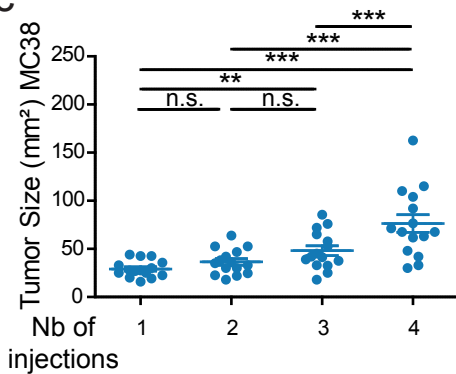

d

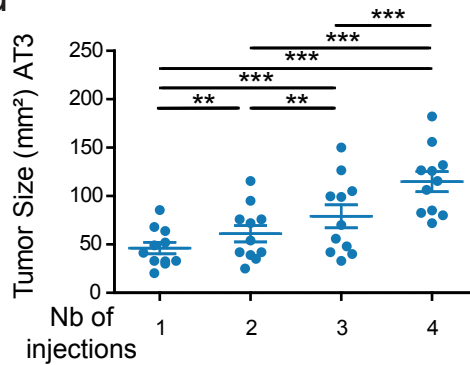

e

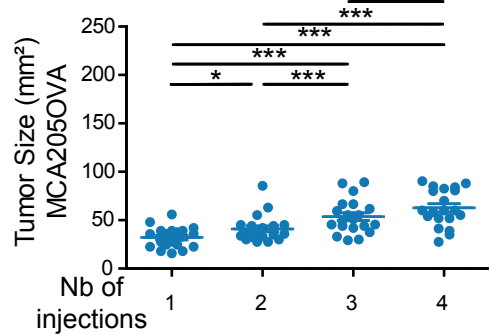

f

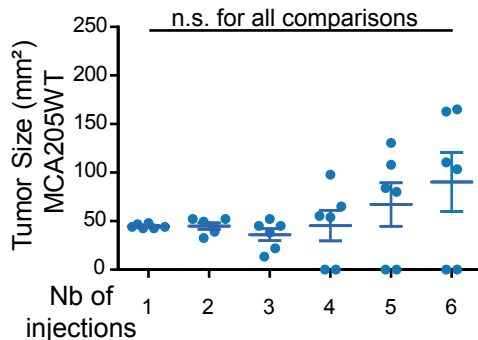

**Supplementary information, Fig S1. Sensitivity and resistance to PD-1 therapy in various tumor models.**

(a) Tumor growth kinetics of MCA205OVA-expressing sarcoma (left panel), survival curves (middle panel) and tumor sizes after sequential injections of isotype or anti-PD-1 mAbs (right panel) are depicted. (b-f) Tumor sizes after sequential injections of anti-PD-1 mAb in MCA205WT (b and f), MC38 (c), AT3 (d) and MCA205OVA (e) tumor models are depicted. Each line or dot represents 1 mouse. The graphs depict pooled data from 1 (f), 2 (d), 3 (b and c) or 4 (a and e) independent experiments including 5-6 mice per group and per experiment. Statistical analyses were performed using unpaired t-tests (a, right panel) or ANOVA statistical tests and pairwise comparisons with Bonferroni adjustment (b-f). \* $p < 0.05$ , \*\* $p < 0.01$ , \*\*\* $p < 0.001$ , n.s.: not significant. Means  $\pm$  SEM are represented.
