# Supplementary material for: Sustained Type I interferon signaling as a mechanism of resistance to PD-1 blockade
Source: PubMed Central journal article supplement (PMC6796942; doi:10.1038/s41422-019-0224-x), 2019-09-03
Supplement: 41422_2019_224_MOESM2_ESM.pdf [file 41422_2019_224_MOESM2_ESM.pdf]

Figure S2

Spleen

Tumor

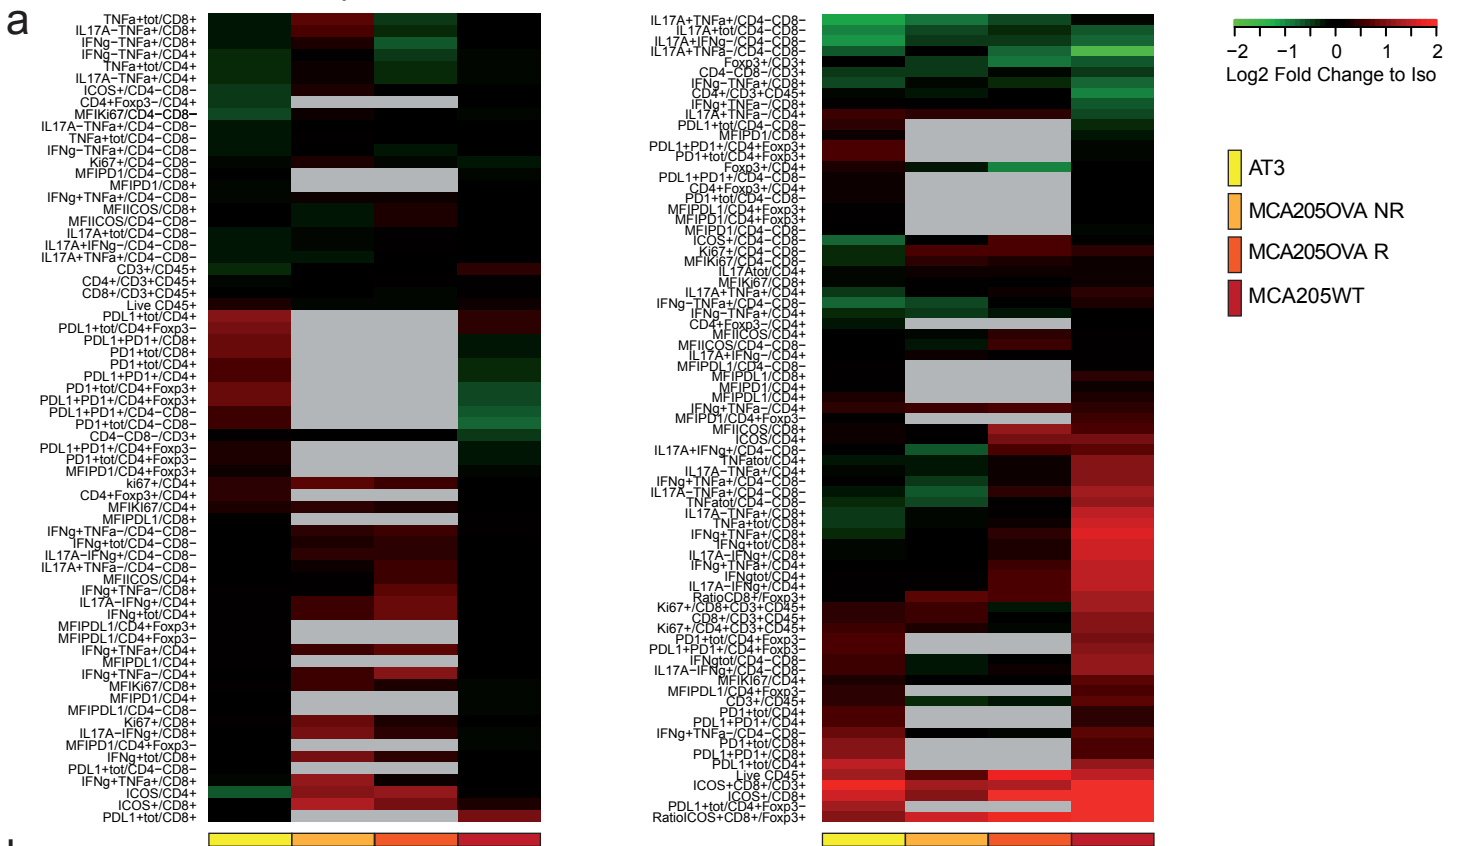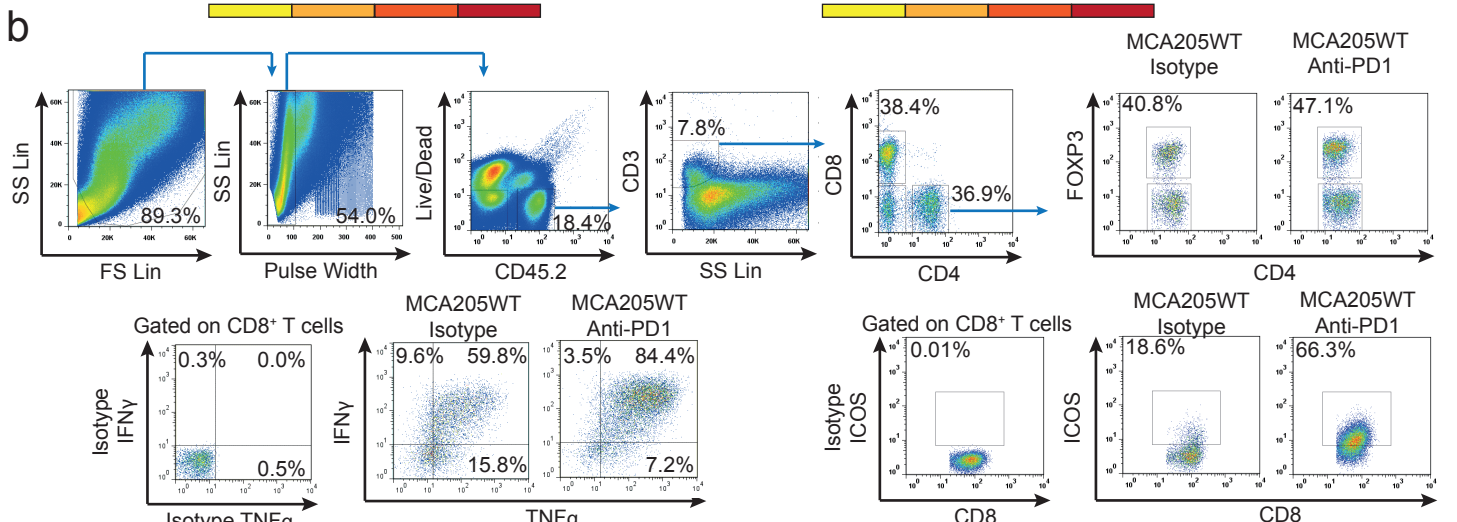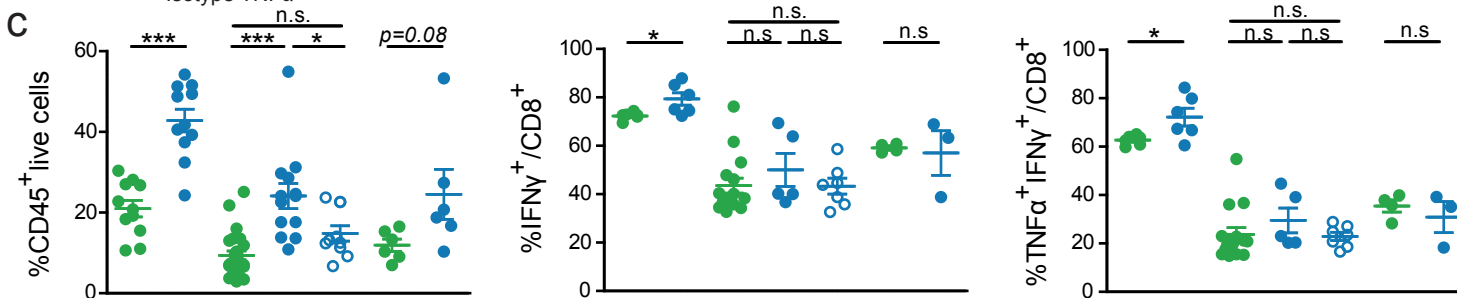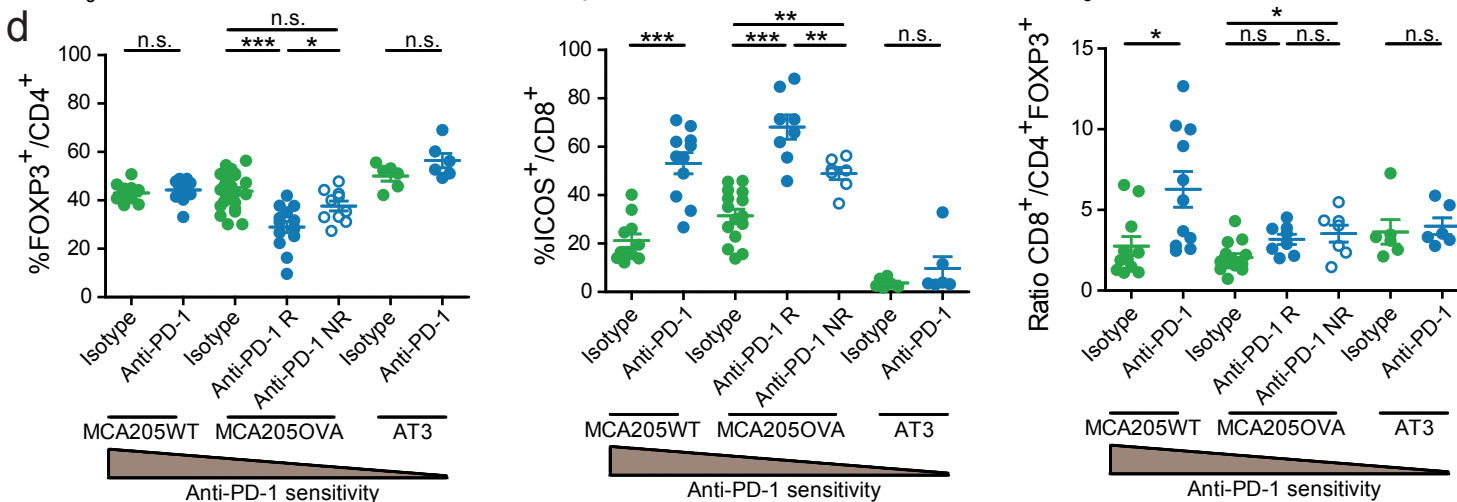

**Supplementary information, Fig S2. Surrogate immune hallmarks of response to PD-1 blockade.**

(a) Spleens and tumors of mice bearing MCA205WT, MCA205OVA and AT3 were analyzed by flow cytometry 48 hrs after the fourth and last injections of anti-PD-1 or its isotype control mAbs. MCA205OVA tumors treated by anti-PD-1 were segregated into responders (R) and non-responders (NR) based on the tumor weight at sacrifice (relative to the isotype controls). Heat maps of the various immune parameters per tumor model based on the  $\log_2$  fold change relative to the isotype control. Gray cells represent parameters non-measured. (b-d) Most significant immunological changes in the tumor bed associated with responses to anti-PD-1 mAb. Representative gating strategy of MCA205WT tumor parameters (b). The percentages of CD45<sup>+</sup> cells (c, left panel), of IFN $\gamma$ <sup>+</sup> and double positive IFN $\gamma$ TNF $\alpha$ <sup>+</sup>CD8 T cells (c, middle and right panels, respectively), of Treg (d, left panel), of CD8<sup>+</sup>ICOS<sup>+</sup> cells (d, middle panel) and the CD8<sup>+</sup>/CD4<sup>+</sup>FOXP3<sup>+</sup> ratio (d, right panel). These data were generated from 1-4 independent pooled experiments per tumor model and each dot represents 1 mouse. ANOVA statistical tests and pairwise comparisons with Bonferroni adjustment were used in (c) and (d) for MCA205OVA. Other statistical analyses were performed using unpaired t-tests. \* $p < 0.05$ , \*\* $p < 0.01$ , \*\*\* $p < 0.001$ , n.s.: not significant. Means  $\pm$  SEM are represented.
