# Supplementary material for: Sustained Type I interferon signaling as a mechanism of resistance to PD-1 blockade
Source: PubMed Central journal article supplement (PMC6796942; doi:10.1038/s41422-019-0224-x), 2019-09-03
Supplement: 41422_2019_224_MOESM3_ESM.pdf [file 41422_2019_224_MOESM3_ESM.pdf]

Figure S3

**a**

MCA205WT

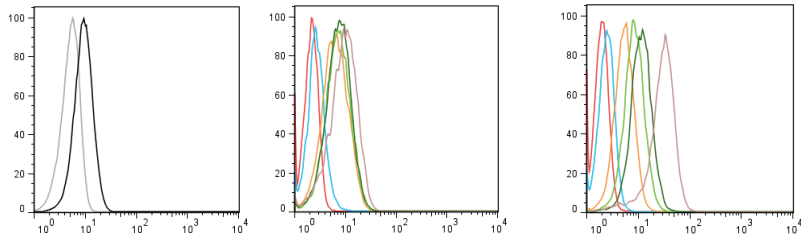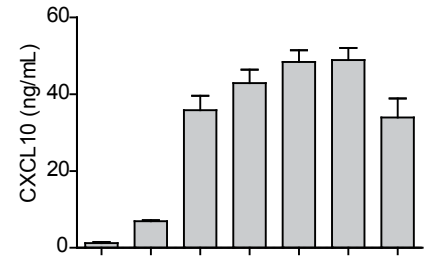

**b**

MCA205OVA

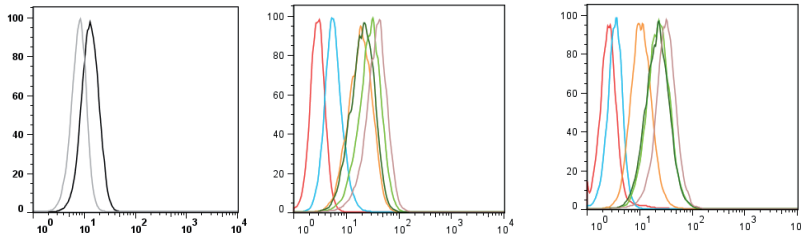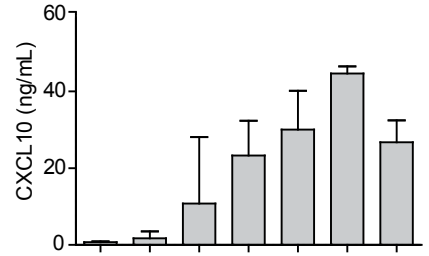

**c**

MC38

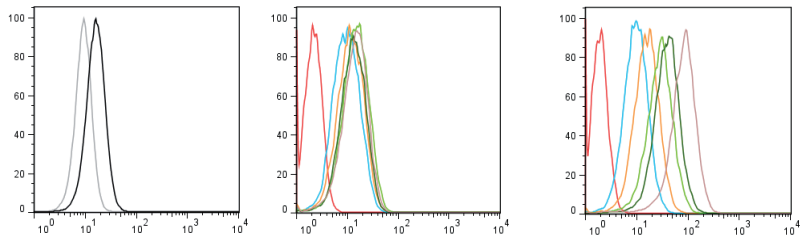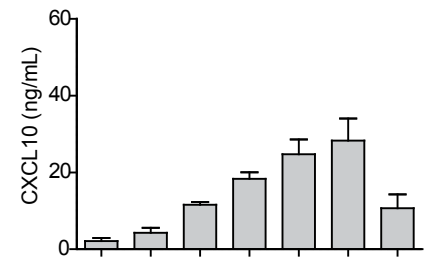

**d**

AT3

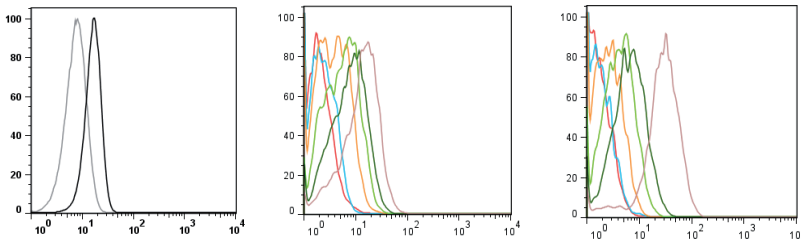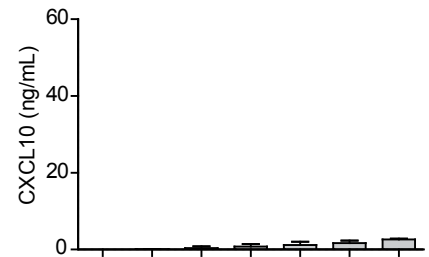

IFNAR1  
 Isotype  
 Anti-IFNAR1 Ab

MHC Class I  
 Isotype  
 Not treated

PD-L1  
 100 UI/ml IFNα  
 1000 UI/ml IFNα  
 5000 UI/ml IFNα  
 5000 UI/ml IFNα

IFNα (UI/ml) - 10 100 500 1000 5000 -  
 IFNγ (UI/ml) - - - - - 5000

**Supplementary information, Fig S3. IFN-induced tumor cell expression of MHC class I, IFNAR1 and PD-L1 molecules and secretion of CXCL10 *in vitro*.**

MCA205WT (a), MCA205OVA (b), MC38 (c) and AT3 (d) cell lines were assessed for IFNAR1 (left panels), MHC Class I (middle) and PD-L1 (right) expression levels by flow cytometry using specific antibodies and appropriate isotype controls after gating on live cells, at baseline and/or after 24 hrs stimulation with increasing concentrations of IFN $\alpha$ . One single concentration of IFN $\gamma$  has been used as a positive control. Supernatant was collected to measure the concentration of CXCL10 by ELISA. For overlays, a typical experiment is depicted out of 3-4 yielding similar results including biological replicates for each experiment. CXCL10 concentration represents a pool of 3-4 experiments including biological replicates for each experiment. Means  $\pm$  SEM are shown.
