# Supplementary material for: Sustained Type I interferon signaling as a mechanism of resistance to PD-1 blockade
Source: PubMed Central journal article supplement (PMC6796942; doi:10.1038/s41422-019-0224-x), 2019-09-03
Supplement: 41422_2019_224_MOESM4_ESM.pdf [file 41422_2019_224_MOESM4_ESM.pdf]

Figure S4

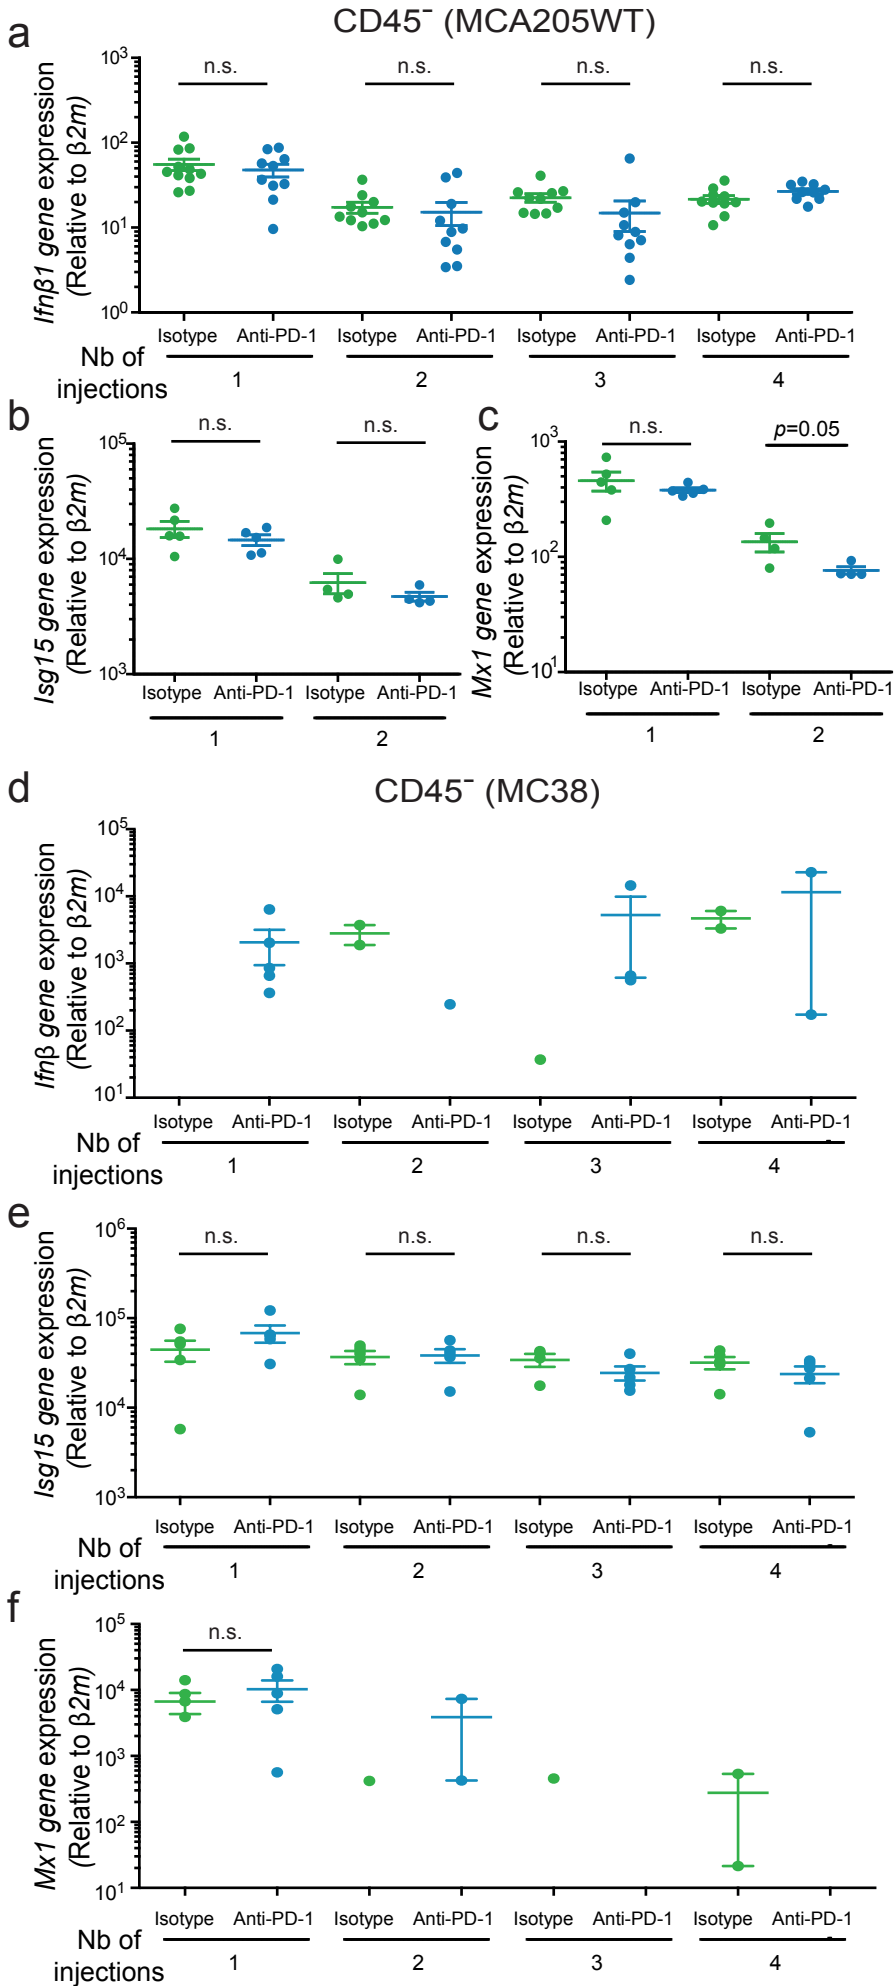

## Supplementary information

**Supplementary information, Fig S4. IFN $\beta$  and ISG gene expression levels in CD45<sup>-</sup> cells isolated from MCA205WT and MC38 tumors.** (a-f) *In vivo* experiments. Flow cytometry sorting of CD45<sup>-</sup> live fractions from the TME of MCA205WT (a-c) or MC38 (d-f) tumors 48 hrs after 1, 2, 3 or 4 i.p. administrations of anti-PD-1 or isotype control mAbs. Relative expression of *Ifn $\beta$ 1* (a and d) and IFN-sensitive gene products (b-c and e-f) quantified by qRT-PCR. Statistical analyses were performed using unpaired t-tests to compare transcription levels between the anti-PD-1 and isotype control treated groups for each time point. Each dot represents 1 mouse with 5 mice per time point and per experiment. Graphs represent 1 representative experiment out of 2-3 independent experiments (MC38, time points 1 and 2, b-c), 1 experiment (MC38, time points 3 and 4) or are the pool of 2-3 independent experiments (a). *Ifn $\beta$*  and *Mx1* gene expression levels were not detected in many samples (d and f). n.s.: not significant. Means  $\pm$  SEM are represented.
