# Supplementary material for: Sustained Type I interferon signaling as a mechanism of resistance to PD-1 blockade
Source: PubMed Central journal article supplement (PMC6796942; doi:10.1038/s41422-019-0224-x), 2019-09-03
Supplement: 41422_2019_224_MOESM5_ESM.pdf [file 41422_2019_224_MOESM5_ESM.pdf]

Figure S5

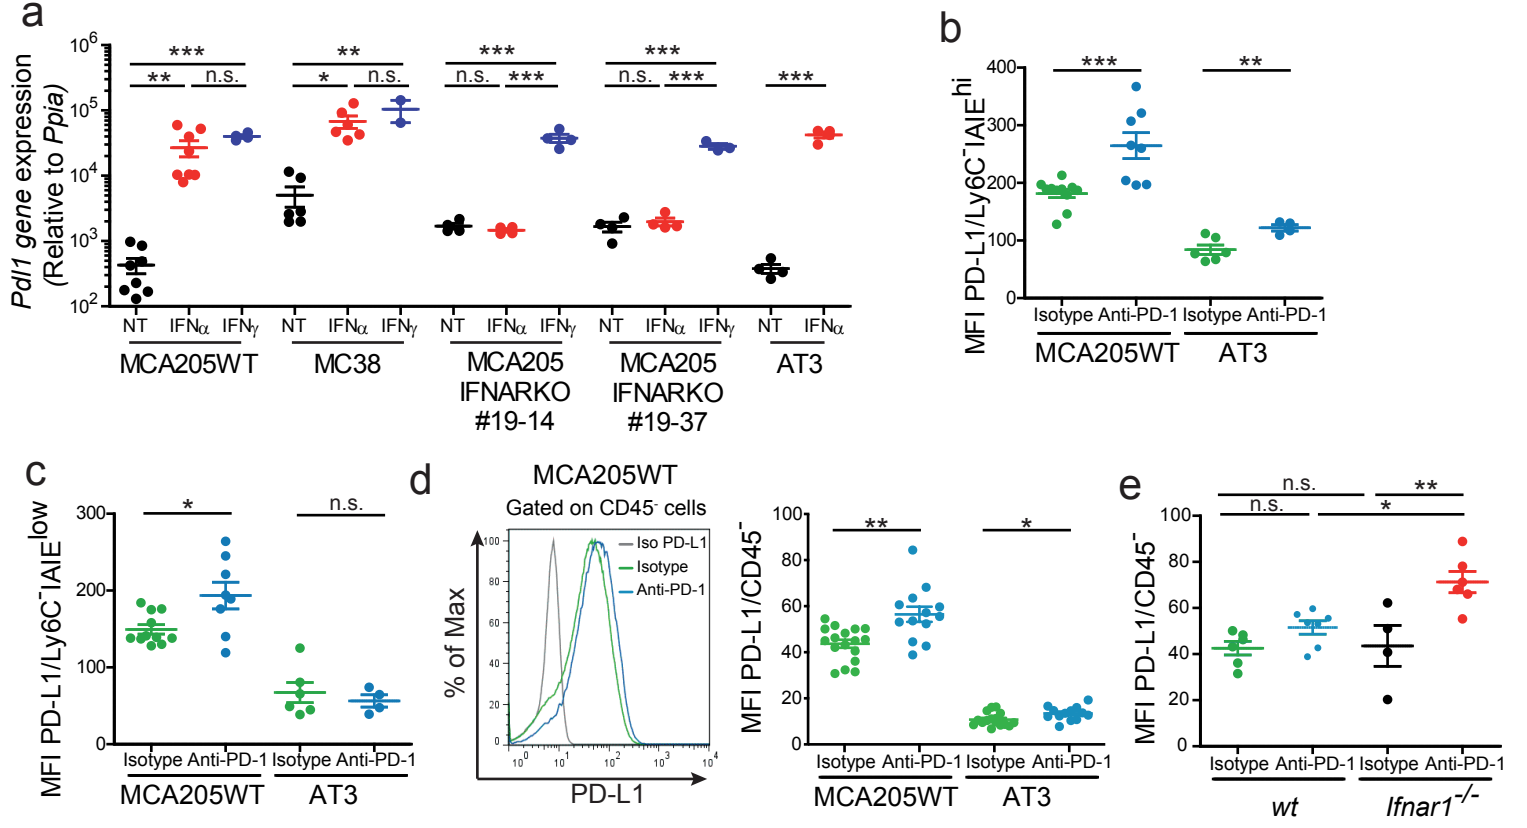

**Supplementary information, Fig S5. Global PD-L1 expression upregulation during PD-1 blockade and post IFN stimulation.**

(a) Relative expression of *Pd11* quantified by qRT-PCR following stimulations of various tumor cell lines with either IFN $\alpha$  or IFN $\gamma$ . Each dot represents 1 stimulated sample and graphs represent 1 experiment or are the pool of 2-3 independent experiments including biological replicates for each experiment. Unpaired t-tests were used to compare two groups or ANOVA statistical tests and pairwise comparisons with Bonferroni adjustment were adopted for more than two groups. (b-d) Mean Fluorescent Intensity (MFI) of PD-L1 expression at the surface of myeloid cells (gated on live CD45<sup>+</sup>CD11b<sup>+</sup>) and CD45<sup>-</sup> live cells assessed by flow cytometry 48 hrs after the last injection of anti-PD-1 or its isotype control mAbs in MCA205WT and AT3 tumor models. Representative histogram of PD-L1 expression on CD45<sup>-</sup> cells isolated from MCA205WT tumors is shown (d). Statistical analyses were performed using unpaired t-tests. (e) MFI of PD-L1 on CD45<sup>-</sup> cells from MCA205WT tumors inoculated in WT or *Ifnar1*<sup>-/-</sup> mice. Statistical analyses were performed using ANOVA statistical test and pairwise comparisons with Bonferroni adjustment. Graphs (b-e) represent 1 or are the pool of 2-4 independent experiments with 5-6 mice per group and per experiment. Each dot corresponds to one mouse. \* $p < 0.05$ , \*\* $p < 0.01$ , \*\*\* $p < 0.001$ , n.s.: not significant. Means  $\pm$  SEM are represented.
