# Supplementary material for: Sustained Type I interferon signaling as a mechanism of resistance to PD-1 blockade
Source: PubMed Central journal article supplement (PMC6796942; doi:10.1038/s41422-019-0224-x), 2019-09-03
Supplement: 41422_2019_224_MOESM6_ESM.pdf [file 41422_2019_224_MOESM6_ESM.pdf]

Figure S6

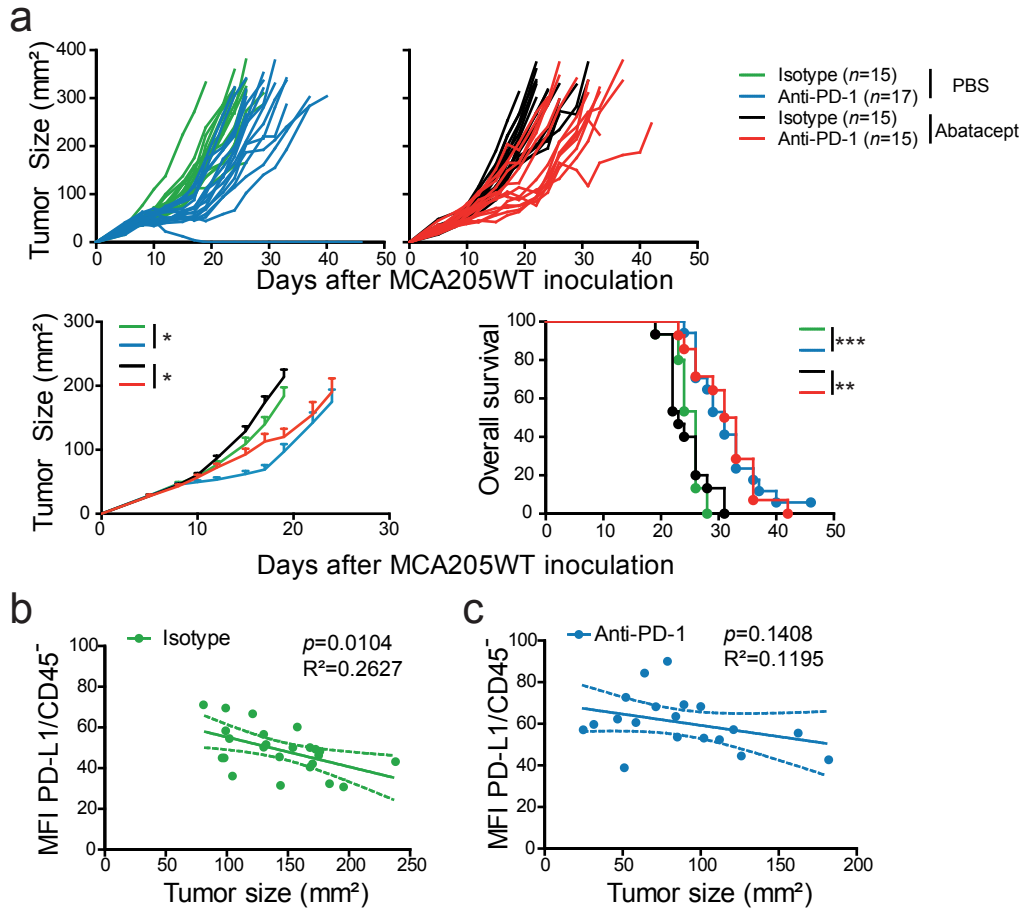

**Supplementary information, Fig S6. CD80/86 engagement or tumoral PD-L1 expression are not associated with resistance to anti-PD-1 therapy.**

(a) Tumor growth kinetics and Kaplan Meier survival curves of MCA205WT tumor bearing mice treated concomitantly with or without Abatacept and anti-PD-1 (and their respective controls). Statistical analyses were performed using the specific software detailed in the Materials and Methods. (b-c) Correlations between the MFI of PD-L1 monitored on the surface of CD45<sup>+</sup> cells isolated from MCA205WT tumors collected from isotype (b) and anti-PD-1 treated mice (c) and their respective tumor size at sacrifice. Pearson correlation was used to determine the correlation between the two variables. Graphs depict results of 2 (a) or 3 (b-c) independent experiments encompassing 5-11 mice/group and per experiment; each line or dot corresponds to one mouse. \* $p < 0.05$ , \*\* $p < 0.01$ , \*\*\* $p < 0.001$ . Means  $\pm$  SEM are represented.
