# Supplementary material for: Sustained Type I interferon signaling as a mechanism of resistance to PD-1 blockade
Source: PubMed Central journal article supplement (PMC6796942; doi:10.1038/s41422-019-0224-x), 2019-09-03
Supplement: 41422_2019_224_MOESM7_ESM.pdf [file 41422_2019_224_MOESM7_ESM.pdf]

Figure S7

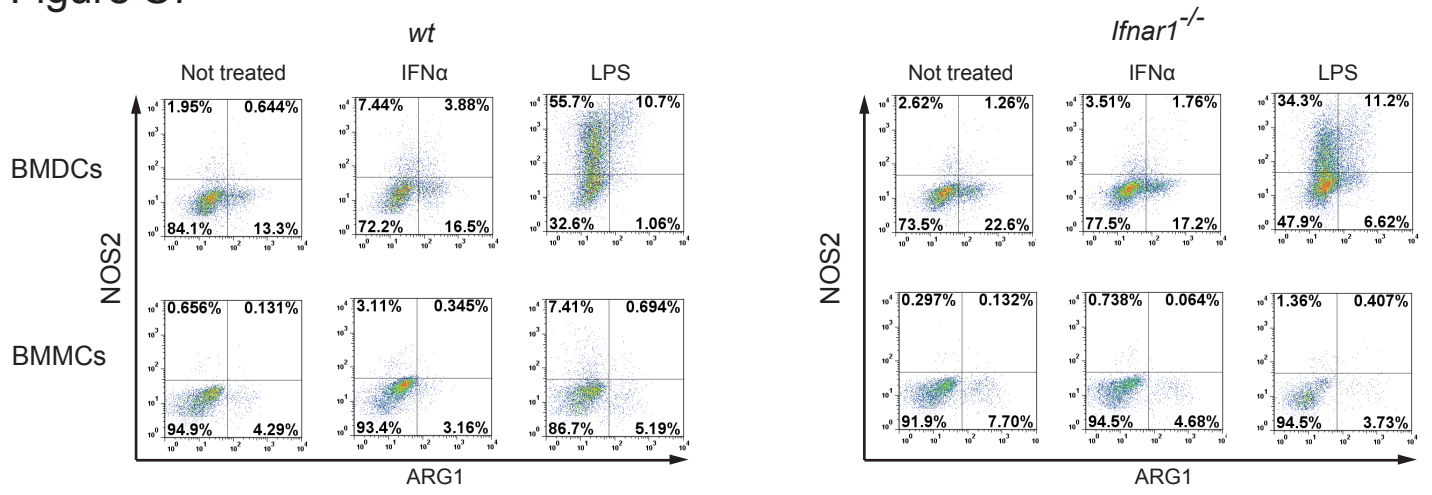

Supplementary information

**Supplementary information, Fig S7. Flow cytometric analyses of ARG1 and NOS2 in BMDCs and BMMCs.**

Representative flow cytometry analysis of intracellular staining with anti-Arginase 1 and anti-NOS2 Abs in BMDCs or BMMCs from WT and *Ifnar1*<sup>-/-</sup> mice stimulated *in vitro* with LPS or IFN $\alpha$  for 24 hrs. Biological replicates were examined for each condition.
