# Supplementary material for: Sustained Type I interferon signaling as a mechanism of resistance to PD-1 blockade
Source: PubMed Central journal article supplement (PMC6796942; doi:10.1038/s41422-019-0224-x), 2019-09-03
Supplement: 41422_2019_224_MOESM8_ESM.pdf [file 41422_2019_224_MOESM8_ESM.pdf]

Figure S8

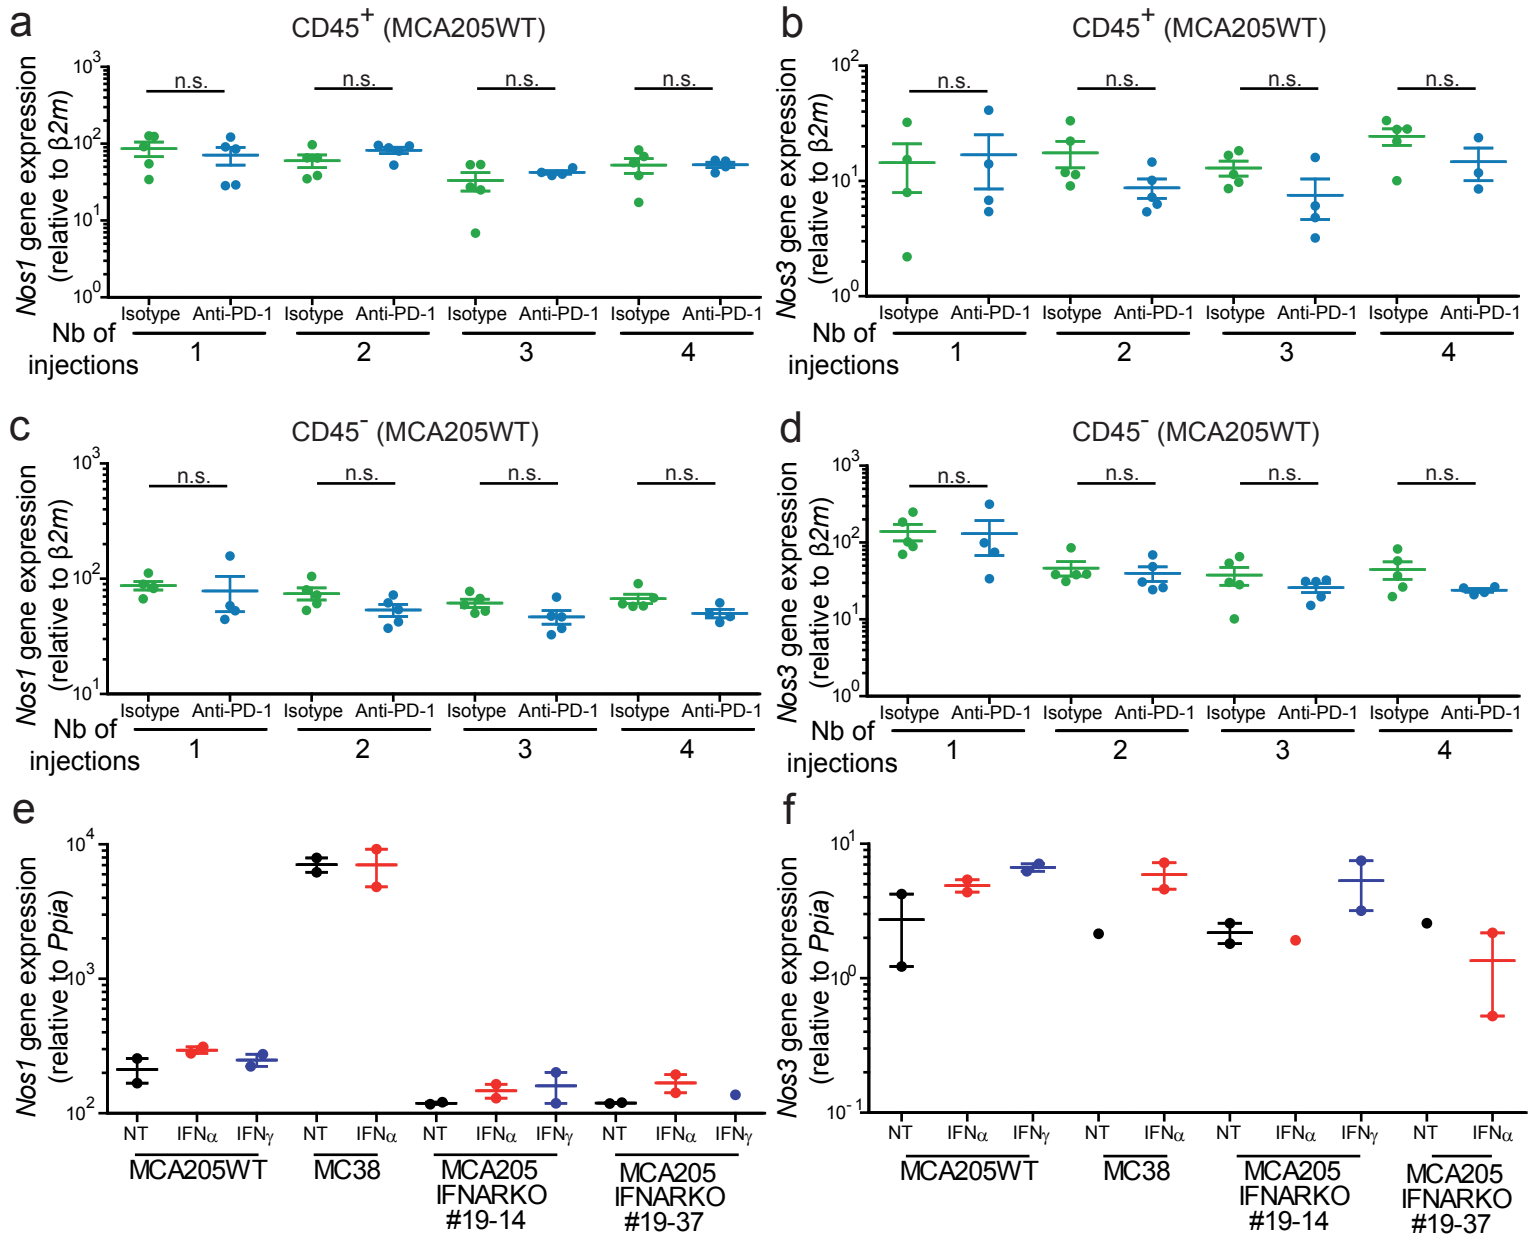

**Supplementary information, Fig S8. Expressions of *Nos1* and *Nos3* are not modulated in the TME during the course of anti-PD-1 mAbs.**

(a-d) *In vivo* experiments. CD45<sup>+</sup> and CD45<sup>-</sup> fractions from MCA205WT tumors were cell sorted 48 hrs after anti-PD-1 mAb (or isotype control) injections. qRT-PCR analyses of *Nos1* (a and c) and *Nos3* (b and d) in CD45<sup>+</sup> (a and b) and CD45<sup>-</sup> (c and d) fractions. (e-f) *In vitro* assays. *Nos1* (e) and *Nos3* (f) expression levels were determined in various tumor cell lines post IFN $\alpha$  or IFN $\gamma$  stimulation. Graphs depict 1 experiment with biological replicates. Each dot represents 1 tumor or 1 stimulation condition. Statistical analyses were performed using unpaired t-tests to compare two groups or ANOVA statistical tests and pairwise comparisons with Bonferroni adjustment for more than two groups. n.s.: not significant. Means  $\pm$  SEM are represented.
