# Supplementary material for: Sustained Type I interferon signaling as a mechanism of resistance to PD-1 blockade
Source: PubMed Central journal article supplement (PMC6796942; doi:10.1038/s41422-019-0224-x), 2019-09-03
Supplement: 41422_2019_224_MOESM9_ESM.pdf [file 41422_2019_224_MOESM9_ESM.pdf]

Figure S9

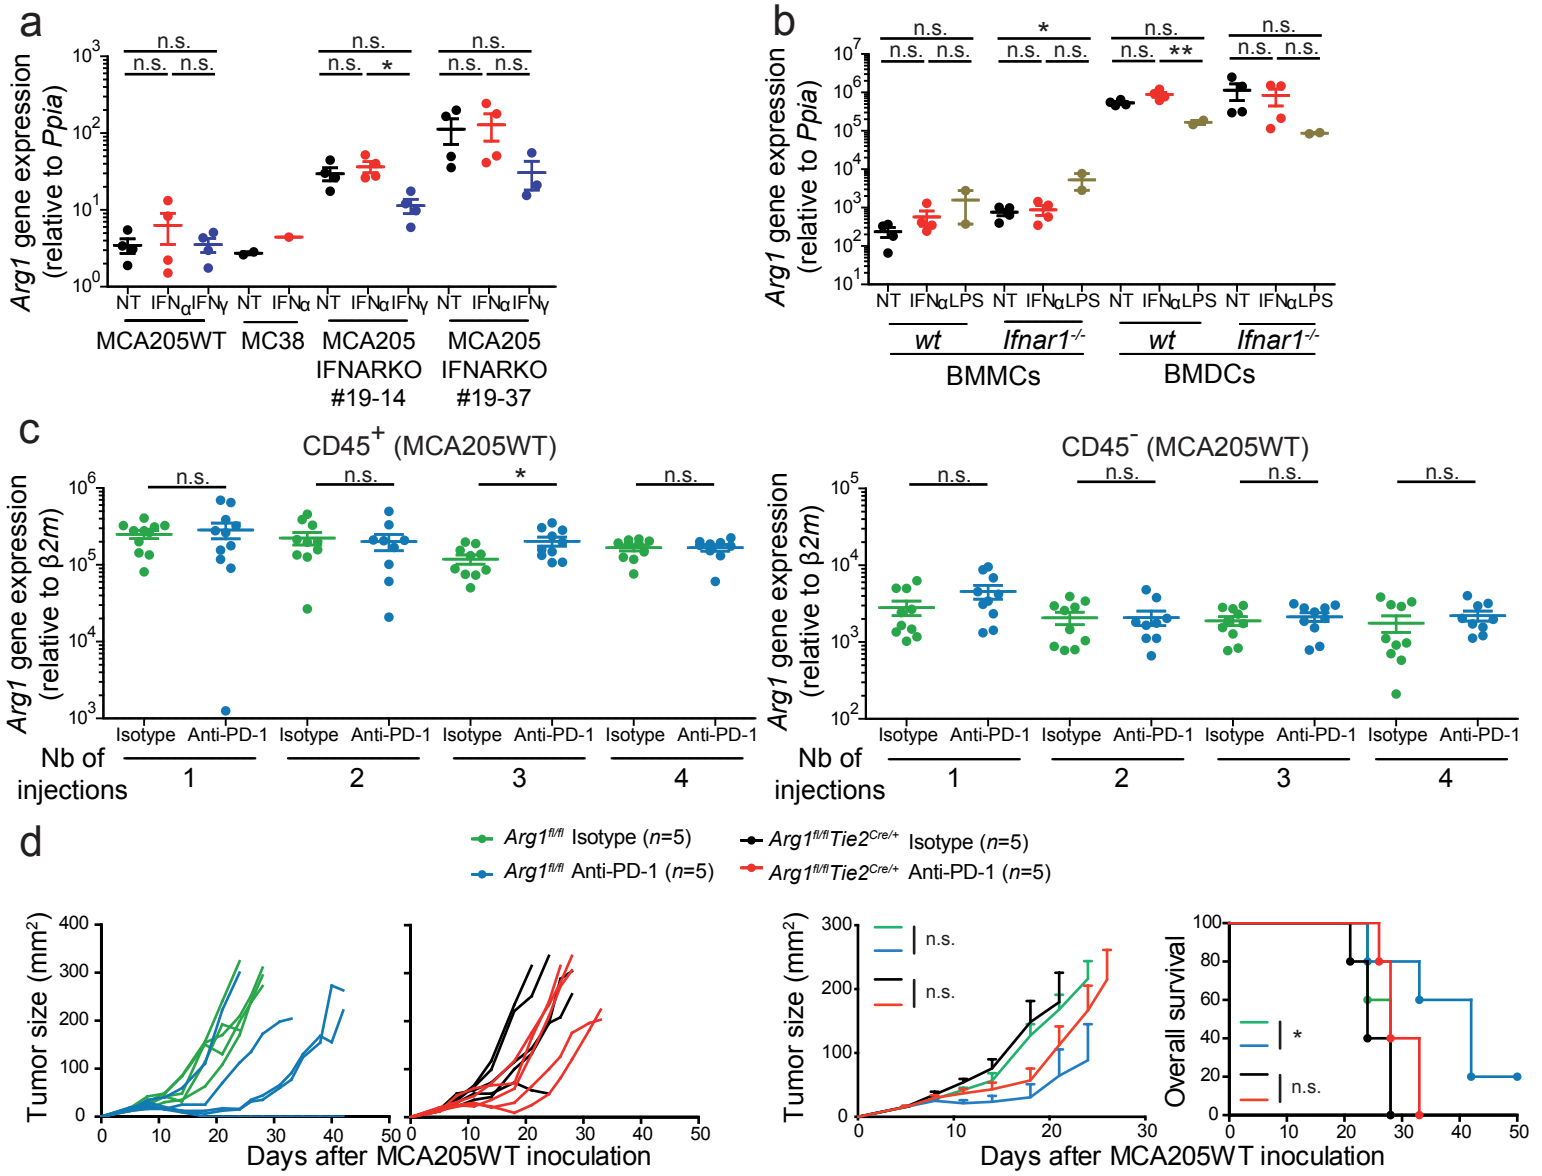

**Supplementary information, Fig S9. Therapeutic resistance to anti-PD-1 mAb is Arginase 1 independent.**

(a-b) *In vitro* assays. Relative expression of *Arg1* quantified by qRT-PCR following stimulations of various tumor cell lines or BMDCs and BMMCs with either IFN $\alpha$ , IFN $\gamma$  or LPS. Each dot represents one stimulated sample and graphs represent 1 experiment or are the pool of 2 independent experiments including biological replicates for each experiment. Statistical analyses were performed using unpaired t-tests to compare two groups or ANOVA statistical tests and pairwise comparisons with Bonferroni adjustment for more than two groups. (c) *In vivo* experiments. Cell sorting by flow cytometry of CD45<sup>+</sup> (left panel) and CD45<sup>-</sup> (right panel) fractions from the TME of MCA205WT 48 hrs after 1, 2, 3 or 4 i.p. administrations of anti-PD-1 (or isotype control) mAbs followed by qRT-PCR quantifying the *Arg1* relative expression. Each dot represents 1 tumor. Graphs represent the pool of 2 experiments with 4-5 mice per group, per time point and per experiment. (d) Tumor growth kinetics and Kaplan Meier survival curves of *Arg1<sup>fl/fl</sup>* and *Arg1<sup>fl/fl</sup>Tie2<sup>Cre/+</sup>* mice inoculated with the MCA205WT tumor model and treated with anti-PD-1 or its isotype control mAbs. Statistical analyses were performed using the specific software detailed in the Materials and Methods. Data are representative of 1 experiment with 5 mice per group. \* $p < 0.05$ , \*\* $p < 0.01$ , n.s.: not significant.
