# Supplementary material for: Sustained Type I interferon signaling as a mechanism of resistance to PD-1 blockade
Source: PubMed Central journal article supplement (PMC6796942; doi:10.1038/s41422-019-0224-x), 2019-09-03
Supplement: 41422_2019_224_MOESM11_ESM.pdf [file 41422_2019_224_MOESM11_ESM.pdf]

Figure S11

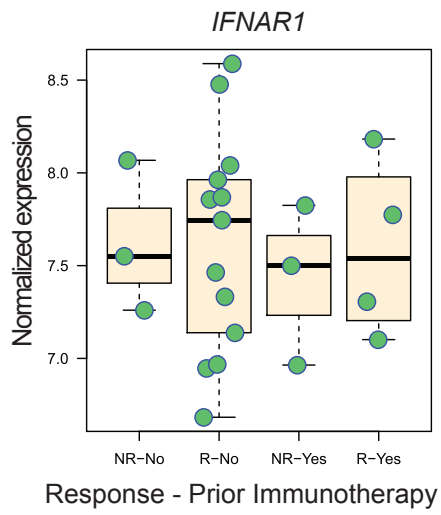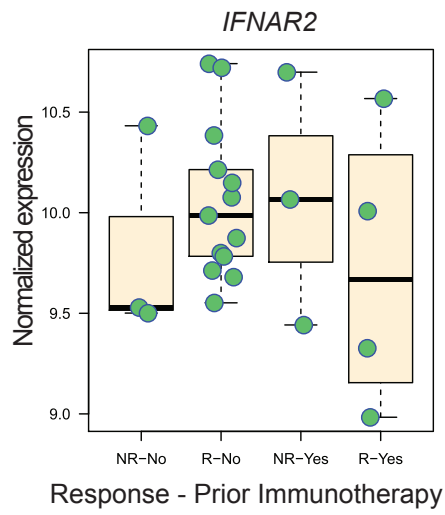

## Supplementary information

### **Supplementary information, Fig S11.**

Boxplots of *IFNAR1* (left) and *IFNAR2* (right) gene expression in pre-treatment samples stratified by response to subsequent combination immune checkpoint blockade (R=responder, NR=non-responder) and receipt of prior immunotherapy (Yes/No) showing no substantial differences between any subgroup.
