# Supplementary material for: Sustained Type I interferon signaling as a mechanism of resistance to PD-1 blockade
Source: PubMed Central journal article supplement (PMC6796942; doi:10.1038/s41422-019-0224-x), 2019-09-03
Supplement: 41422_2019_224_MOESM12_ESM.pdf [file 41422_2019_224_MOESM12_ESM.pdf]

Table S1 : Genes list found differentially expressed post anti-PD-1 treatment in CD45<sup>+</sup> cells

| Downregulated genes |              |             |
|---------------------|--------------|-------------|
| GeneName            | logFC        | p.value     |
| Igh-VJ558           | -0,588147346 | 0,000770031 |
| Tns1                | -0,630399079 | 0,001605814 |
| Bcar3               | -0,608438415 | 0,001947286 |
| Olfrl11             | -1,005908493 | 0,002208479 |
| Mgl2                | -1,130733319 | 0,003047944 |
| Tcrg-V1             | -0,768636655 | 0,003107205 |
| COX1                | -0,606473561 | 0,003143469 |
| Zdhhc14             | -0,650586235 | 0,005076849 |
| Zranb1              | -0,616840727 | 0,005622662 |
| Ccl17               | -1,268308284 | 0,006575942 |
| Plxdc2              | -0,742127905 | 0,00738555  |
| Gm8680              | -0,651866875 | 0,010920686 |
| Retnlg              | -0,850612057 | 0,011612273 |
| Plet1               | -0,941079444 | 0,013157657 |
| Hp1bp3              | -0,592604523 | 0,014476284 |
| Il1a                | -0,875921079 | 0,019232187 |
| Zkscan3             | -1,005924357 | 0,019328747 |
| Clec4n              | -0,59232767  | 0,021008517 |
| Igkv8-30            | -0,720322357 | 0,023857958 |
| Anapc1              | -0,861952817 | 0,029778845 |
| Mmp12               | -0,804784063 | 0,033921738 |
| Tcrg-V4             | -0,787778644 | 0,03608202  |

| Upregulated genes |             |             |
|-------------------|-------------|-------------|
| GeneName          | logFC       | p.value     |
| C4b               | 0,621016055 | 1,46378E-05 |
| Slc4a11           | 1,046422288 | 0,000123917 |
| Hk3               | 0,688772445 | 0,000192591 |
| Slamf8            | 0,648146459 | 0,000361821 |
| Nos2              | 1,219194586 | 0,000803245 |
| Irg1              | 0,795357716 | 0,001032831 |
| Smpd3b            | 0,669662873 | 0,001313525 |
| Slco2a1           | 0,767029039 | 0,002081427 |
| Gbp2b             | 1,536388287 | 0,002544813 |
| Abhd16a           | 0,754939361 | 0,004127977 |
| Pdpk1             | 0,597633371 | 0,006370427 |
| Igfp1             | 0,621115521 | 0,006885211 |
| Riok3             | 0,68263627  | 0,010174209 |
| Rnf220            | 1,281218931 | 0,012430493 |
| Ly6i              | 0,602969515 | 0,012596897 |
| Xpo7              | 0,640173124 | 0,01621813  |
| Gbf1              | 0,85268858  | 0,022081152 |
| Dhrs1             | 0,707689893 | 0,022172429 |
| Huwe1             | 0,865743918 | 0,02643558  |
