# Supplementary material for: Sustained Type I interferon signaling as a mechanism of resistance to PD-1 blockade
Source: PubMed Central journal article supplement (PMC6796942; doi:10.1038/s41422-019-0224-x), 2019-09-03
Supplement: 41422_2019_224_MOESM13_ESM.pdf [file 41422_2019_224_MOESM13_ESM.pdf]

Table S2. Related to Figure S8 (B-C). Patient's characteristics

|                                                                   |      | All - N (%) | Germany - N (%) | Italy - N (%) |
|-------------------------------------------------------------------|------|-------------|-----------------|---------------|
| <b>Gender</b>                                                     | F    | 0 (0)       | 0 (0)           | 0 (0)         |
|                                                                   | M    | 7 (100)     | 3 (100)         | 4 (100)       |
| <b>Age at the time of the treatment (years, Median [Min;Max])</b> |      | 57 [38;75]  | 74 [48;75]      | 52 [38;58]    |
| <b>Tumor stage</b>                                                | III  | 2 (29)      | 2 (66)          | 0 (0)         |
|                                                                   | IV   | 5 (71)      | 1 (33)          | 4 (100)       |
| <b>Previous treatments</b>                                        | No   | 2 (29)      | 2 (66)          | 0 (0)         |
|                                                                   | Yes* | 5 (71)      | 1 (33)          | 4 (100)       |
| <b>Tumor response</b>                                             | PR   | 3 (43)      | 0 (0)           | 3 (75)        |
|                                                                   | SD   | 1 (14)      | 1 (33)          | 0 (0)         |
|                                                                   | PD   | 3 (43)      | 2 (66)          | 1 (25)        |
| <b>Toxicity</b>                                                   | No   | 6 (86)      | 2 (67)          | 4 (100)       |
|                                                                   | Yes  | 1 (14)      | 1 (33)          | 0 (0)         |

\* All previous treatments were composed of at least one line of Immune checkpoint blocker  
PR: partial response. SD: stable disease. PD: progressive disease
