# Supplementary material for: Sustained Type I interferon signaling as a mechanism of resistance to PD-1 blockade
Source: PubMed Central journal article supplement (PMC6796942; doi:10.1038/s41422-019-0224-x), 2019-09-03
Supplement: 41422_2019_224_MOESM14_ESM.pdf [file 41422_2019_224_MOESM14_ESM.pdf]

Table S3: Details of the custom-designed 795-gene codeset

| CodeClass  | Name   | Accession      |
|------------|--------|----------------|
| Positive   | POS_A  | ERCC_00117.1   |
| Positive   | POS_B  | ERCC_00112.1   |
| Positive   | POS_C  | ERCC_00002.1   |
| Positive   | POS_D  | ERCC_00092.1   |
| Positive   | POS_E  | ERCC_00035.1   |
| Positive   | POS_F  | ERCC_00034.1   |
| Negative   | NEG_A  | ERCC_00096.1   |
| Negative   | NEG_B  | ERCC_00041.1   |
| Negative   | NEG_C  | ERCC_00019.1   |
| Negative   | NEG_D  | ERCC_00076.1   |
| Negative   | NEG_E  | ERCC_00098.1   |
| Negative   | NEG_F  | ERCC_00126.1   |
| Negative   | NEG_G  | ERCC_00144.1   |
| Negative   | NEG_H  | ERCC_00154.1   |
| Endogenous | ABCF1  | NM_001025091.1 |
| Endogenous | ACKR2  | NM_001296.3    |
| Endogenous | ACKR4  | NM_016557.2    |
| Endogenous | ACO2   | NM_001098.2    |
| Endogenous | ACTB   | NM_001101.2    |
| Endogenous | ACVR1C | NM_145259.2    |
| Endogenous | ACVR2A | NM_001616.3    |
| Endogenous | ACVR2B | NM_001106.2    |
| Endogenous | ADA    | NM_000022.2    |
| Endogenous | AIM2   | NM_004833.1    |
| Endogenous | ALAS1  | NM_000688.4    |
| Endogenous | ALCAM  | NM_001627.3    |
| Endogenous | AMICA1 | NM_153206.2    |
| Endogenous | AMIGO1 | NM_020703.2    |
| Endogenous | AMIGO2 | NM_001143668.1 |
| Endogenous | AMIGO3 | NM_198722.2    |
| Endogenous | ANGPT1 | NM_001146.3    |
| Endogenous | ANGPT2 | NM_001118887.1 |
| Endogenous | ANGPT4 | NM_015985.2    |
| Endogenous | AOC3   | NM_003734.2    |
| Endogenous | ARG1   | NM_000045.2    |
| Endogenous | ARG2   | NM_001172.3    |
| Endogenous | BATF3  | NM_018664.2    |
| Endogenous | BCAM   | NM_005581.3    |
| Endogenous | BCAN   | NM_198427.1    |
| Endogenous | BECN1  | NM_003766.2    |
| Endogenous | BGN    | NM_001711.3    |
| Endogenous | BID    | NM_197966.1    |
| Endogenous | BMPR1A | NM_004329.2    |
| Endogenous | BMPR1B | NM_001203.1    |

|            |        |                |
|------------|--------|----------------|
| Endogenous | BMPR2  | NM_001204.5    |
| Endogenous | BST2   | NM_004335.2    |
| Endogenous | C3     | NM_000064.2    |
| Endogenous | C5     | NM_001735.2    |
| Endogenous | CADM1  | NM_014333.3    |
| Endogenous | CADM2  | NM_001167674.1 |
| Endogenous | CADM3  | NM_001127173.1 |
| Endogenous | CADM4  | NM_145296.1    |
| Endogenous | CALR   | NM_004343.2    |
| Endogenous | CANX   | NM_001024649.1 |
| Endogenous | CARD11 | NM_032415.2    |
| Endogenous | CASP1  | NM_033294.2    |
| Endogenous | CASP3  | NM_004346.3    |
| Endogenous | CASP4  | NM_001225.3    |
| Endogenous | CCL1   | NM_002981.1    |
| Endogenous | CCL11  | NM_002986.2    |
| Endogenous | CCL13  | NM_005408.2    |
| Endogenous | CCL14  | NM_032963.3    |
| Endogenous | CCL15  | NM_032965.4    |
| Endogenous | CCL16  | NM_004590.2    |
| Endogenous | CCL17  | NM_002987.2    |
| Endogenous | CCL18  | NM_002988.2    |
| Endogenous | CCL19  | NM_006274.2    |
| Endogenous | CCL2   | NM_002982.3    |
| Endogenous | CCL20  | NM_004591.2    |
| Endogenous | CCL21  | NM_002989.2    |
| Endogenous | CCL22  | NM_002990.3    |
| Endogenous | CCL23  | NM_145898.1    |
| Endogenous | CCL24  | NM_002991.2    |
| Endogenous | CCL25  | NM_005624.2    |
| Endogenous | CCL26  | NM_006072.4    |
| Endogenous | CCL27  | NM_006664.2    |
| Endogenous | CCL28  | NM_148672.2    |
| Endogenous | CCL3   | NM_002983.2    |
| Endogenous | CCL4   | NM_002984.2    |
| Endogenous | CCL5   | NM_002985.2    |
| Endogenous | CCL7   | NM_006273.2    |
| Endogenous | CCL8   | NM_005623.2    |
| Endogenous | CCR1   | NM_001295.2    |
| Endogenous | CCR10  | NM_016602.1    |
| Endogenous | CCR2   | NM_000647.3    |
| Endogenous | CCR3   | NM_001837.2    |
| Endogenous | CCR4   | NM_005508.4    |
| Endogenous | CCR5   | NM_000579.1    |
| Endogenous | CCR6   | NM_004367.5    |
| Endogenous | CCR7   | NM_001838.2    |

|            |          |                   |
|------------|----------|-------------------|
| Endogenous | CCR8     | NM_005201.2       |
| Endogenous | CD109    | NM_133493.3       |
| Endogenous | CD14     | NM_000591.2       |
| Endogenous | CD19     | NM_001770.4       |
| Endogenous | CD1A     | NM_001763.2       |
| Endogenous | CD1B     | NM_001764.2       |
| Endogenous | CD1C     | NM_001765.2       |
| Endogenous | CD1D     | NM_001766.3       |
| Endogenous | CD1E     | NM_001042583.1    |
| Endogenous | CD200    | NM_005944.5       |
| Endogenous | CD200R1  | NM_138939.2       |
| Endogenous | CD209    | NM_021155.3       |
| Endogenous | CD22     | NM_001771.2       |
| Endogenous | CD244    | NM_016382.2       |
| Endogenous | CD247    | NM_198053.1       |
| Endogenous | CD274    | NM_014143.2       |
| Endogenous | CD28     | NM_001243078.1    |
| Endogenous | CD34     | NM_001773.2       |
| Endogenous | CD3D     | NM_000732.4       |
| Endogenous | CD3E     | NM_000733.2       |
| Endogenous | CD3G     | NM_000073.2       |
| Endogenous | CD4      | NM_000616.4       |
| Endogenous | CD40     | NM_152854.2       |
| Endogenous | CD40LG   | NM_000074.2       |
| Endogenous | CD44     | NM_001001392.1    |
| Endogenous | CD45R0   | NM_080921.3       |
| Endogenous | CD45RA   | NM_002838.4       |
| Endogenous | CD45RB   | ENST00000367367.1 |
| Endogenous | CD48     | NM_001778.2       |
| Endogenous | CD68     | NM_001251.2       |
| Endogenous | CD70     | NM_001252.2       |
| Endogenous | CD72     | NM_001782.2       |
| Endogenous | CD74     | NM_001025159.1    |
| Endogenous | CD79A    | NM_021601.3       |
| Endogenous | CD79B    | NM_021602.2       |
| Endogenous | CD80     | NM_005191.3       |
| Endogenous | CD81     | NM_004356.3       |
| Endogenous | CD86     | NM_006889.3       |
| Endogenous | CD8A     | NM_001768.5       |
| Endogenous | CD8B     | NM_172099.2       |
| Endogenous | CDH1     | NM_004360.2       |
| Endogenous | CDH2     | NM_001792.3       |
| Endogenous | CDH3     | NM_001793.4       |
| Endogenous | CEACAM1  | NM_001712.3       |
| Endogenous | CEACAM16 | NM_001039213.2    |
| Endogenous | CEACAM19 | NM_001127893.1    |

|            |          |                |
|------------|----------|----------------|
| Endogenous | CEACAM20 | NM_001102597.1 |
| Endogenous | CEACAM21 | NM_001098506.1 |
| Endogenous | CEACAM3  | NM_001815.2    |
| Endogenous | CEACAM4  | NM_001817.2    |
| Endogenous | CEACAM5  | NM_004363.2    |
| Endogenous | CEACAM6  | NM_002483.4    |
| Endogenous | CEACAM7  | NM_006890.2    |
| Endogenous | CEACAM8  | NM_001816.3    |
| Endogenous | CELA1    | NM_001971.5    |
| Endogenous | CERCAM   | NM_016174.4    |
| Endogenous | CERK     | NM_182661.1    |
| Endogenous | CHIT1    | NM_003465.2    |
| Endogenous | CHL1     | NM_006614.2    |
| Endogenous | CHUK     | NM_001278.3    |
| Endogenous | CIITA    | NM_000246.3    |
| Endogenous | CKLF     | NM_001040138.1 |
| Endogenous | CLEC4E   | NM_014358.2    |
| Endogenous | CLEC4M   | NM_001144907.1 |
| Endogenous | CLEC6A   | NM_001007033.1 |
| Endogenous | CLEC7A   | NM_197954.2    |
| Endogenous | CLTC     | NM_004859.3    |
| Endogenous | CMA1     | NM_001836.2    |
| Endogenous | COX5A    | NM_004255.3    |
| Endogenous | CR1      | XM_005273064.1 |
| Endogenous | CR2      | NM_001877.3    |
| Endogenous | CRADD    | NM_003805.3    |
| Endogenous | CRP      | NM_000567.2    |
| Endogenous | CSF1R    | NM_005211.3    |
| Endogenous | CSRP1    | NM_004078.2    |
| Endogenous | CTLA4    | NM_005214.3    |
| Endogenous | CTNNB1   | NM_001098210.1 |
| Endogenous | CTSB     | NM_001908.3    |
| Endogenous | CTSE     | NM_001910.2    |
| Endogenous | CTSG     | NM_001911.2    |
| Endogenous | CTSL     | NM_001912.4    |
| Endogenous | CTSS     | NM_004079.3    |
| Endogenous | CTSV     | NM_001333.3    |
| Endogenous | CX3CL1   | NM_002996.3    |
| Endogenous | CX3CR1   | NM_001337.3    |
| Endogenous | CXCL1    | NM_001511.1    |
| Endogenous | CXCL10   | NM_001565.3    |
| Endogenous | CXCL11   | NM_005409.3    |
| Endogenous | CXCL12   | NM_000609.5    |
| Endogenous | CXCL13   | NM_006419.2    |
| Endogenous | CXCL14   | NM_004887.4    |
| Endogenous | CXCL16   | NM_001100812.1 |

|            |        |                |
|------------|--------|----------------|
| Endogenous | CXCL17 | NM_198477.1    |
| Endogenous | CXCL2  | NM_002089.3    |
| Endogenous | CXCL3  | NM_002090.2    |
| Endogenous | CXCL5  | NM_002994.3    |
| Endogenous | CXCL6  | NM_002993.3    |
| Endogenous | CXCL8  | NM_000584.2    |
| Endogenous | CXCL9  | NM_002416.1    |
| Endogenous | CXCR1  | NM_000634.2    |
| Endogenous | CXCR2  | NM_001168298.1 |
| Endogenous | CXCR4  | NM_001008540.1 |
| Endogenous | CXCR6  | NM_006564.1    |
| Endogenous | CYBA   | NM_000101.2    |
| Endogenous | CYBB   | NM_000397.3    |
| Endogenous | CYCS   | NM_018947.4    |
| Endogenous | CYLD   | NM_015247.1    |
| Endogenous | CYR61  | NM_001554.3    |
| Endogenous | DAXX   | NM_001350.3    |
| Endogenous | DDR1   | NM_001954.4    |
| Endogenous | DDR2   | NM_001014796.1 |
| Endogenous | DDX17  | NM_030881.3    |
| Endogenous | DDX58  | NM_014314.3    |
| Endogenous | DDX60  | NM_017631.5    |
| Endogenous | DES    | NM_001927.3    |
| Endogenous | DHX58  | NM_024119.2    |
| Endogenous | DKK2   | NM_014421.2    |
| Endogenous | DLL4   | NM_019074.3    |
| Endogenous | DSCAM  | NM_001389.3    |
| Endogenous | DSTYK  | NM_015375.1    |
| Endogenous | DUSP5  | NM_004419.3    |
| Endogenous | DUSP6  | NM_001946.2    |
| Endogenous | ECD    | NM_001135752.1 |
| Endogenous | ECM1   | NM_004425.3    |
| Endogenous | ECM2   | NM_001393.2    |
| Endogenous | EDN1   | NM_001168319.1 |
| Endogenous | EDN2   | NM_001956.3    |
| Endogenous | EDN3   | NM_000114.2    |
| Endogenous | EED    | NM_003797.2    |
| Endogenous | EFEMP1 | NM_004105.3    |
| Endogenous | EFEMP2 | NM_016938.3    |
| Endogenous | EFNA1  | NM_182685.1    |
| Endogenous | EFNA2  | NM_001405.3    |
| Endogenous | EFNA3  | NM_004952.4    |
| Endogenous | EFNA4  | NM_005227.2    |
| Endogenous | EFNA5  | NM_001962.2    |
| Endogenous | EFNB1  | NM_004429.4    |
| Endogenous | EFNB2  | NM_004093.2    |

|            |         |                |
|------------|---------|----------------|
| Endogenous | EFNB3   | NM_001406.3    |
| Endogenous | EGR1    | NM_001964.2    |
| Endogenous | EMR1    | NM_001974.3    |
| Endogenous | EPHA1   | NM_005232.3    |
| Endogenous | EPHA10  | NM_173641.2    |
| Endogenous | EPHA2   | NM_004431.2    |
| Endogenous | EPHA3   | NM_005233.5    |
| Endogenous | EPHA4   | NM_004438.3    |
| Endogenous | EPHA5   | NM_004439.4    |
| Endogenous | EPHA6   | NM_173655.2    |
| Endogenous | EPHA7   | NM_004440.2    |
| Endogenous | EPHB1   | NM_004441.3    |
| Endogenous | EPHB2   | NM_017449.2    |
| Endogenous | EPHB3   | NM_004443.3    |
| Endogenous | EPHB4   | NM_004444.4    |
| Endogenous | EPHB6   | NM_004445.3    |
| Endogenous | ERAP1   | NM_001040458.1 |
| Endogenous | ERAP2   | NM_022350.1    |
| Endogenous | ESAM    | NM_138961.2    |
| Endogenous | ETV1    | NM_004956.4    |
| Endogenous | ETV4    | NM_001079675.1 |
| Endogenous | ETV5    | NM_004454.2    |
| Endogenous | F11R    | NM_144503.1    |
| Endogenous | F2R     | NM_001992.2    |
| Endogenous | F2RL1   | NM_005242.3    |
| Endogenous | FADD    | NM_003824.2    |
| Endogenous | FAM19A1 | NM_213609.2    |
| Endogenous | FAM19A2 | NM_178539.3    |
| Endogenous | FAM19A3 | NM_182759.2    |
| Endogenous | FAM19A4 | NM_182522.3    |
| Endogenous | FAM69B  | NM_152421.3    |
| Endogenous | FAP     | NM_004460.2    |
| Endogenous | FAS     | NM_152874.1    |
| Endogenous | FASLG   | NM_000639.1    |
| Endogenous | FCER1G  | NM_004106.1    |
| Endogenous | FCGR2B  | NM_001002273.1 |
| Endogenous | FCGR3A  | NM_000569.6    |
| Endogenous | FCGRT   | NM_004107.3    |
| Endogenous | FCN2    | NM_015837.2    |
| Endogenous | FGF10   | NM_004465.1    |
| Endogenous | FGF2    | NM_002006.4    |
| Endogenous | FGFR1   | NM_023110.2    |
| Endogenous | FGFR2   | NM_000141.4    |
| Endogenous | FGFR3   | NM_000142.4    |
| Endogenous | FGFR4   | NM_002011.3    |
| Endogenous | FGFRL1  | NM_001004356.2 |

|            |          |                |
|------------|----------|----------------|
| Endogenous | FLT1     | NM_002019.4    |
| Endogenous | FLT3     | NM_004119.2    |
| Endogenous | FLT4     | NM_182925.4    |
| Endogenous | FOSL1    | NM_005438.3    |
| Endogenous | FOXO1    | NM_002015.3    |
| Endogenous | FOXO3    | NM_001455.2    |
| Endogenous | FOXP3    | NM_014009.3    |
| Endogenous | FREM1    | NM_144966.5    |
| Endogenous | FREM2    | NM_207361.4    |
| Endogenous | FURIN    | NM_002569.2    |
| Endogenous | G6PD     | NM_000402.3    |
| Endogenous | GAPDH    | NM_002046.3    |
| Endogenous | GDF15-C  | NM_004864.2    |
| Endogenous | GDF15-N  | NM_004864.2    |
| Endogenous | GF11     | NM_001127216.1 |
| Endogenous | GNLY     | NM_012483.2    |
| Endogenous | GPC1     | NM_002081.2    |
| Endogenous | GPX1     | NM_000581.2    |
| Endogenous | GRAP2    | NM_004810.2    |
| Endogenous | GRN      | NM_002087.2    |
| Endogenous | GUSB     | NM_000181.3    |
| Endogenous | GZMA     | NM_006144.2    |
| Endogenous | GZMB     | NM_004131.4    |
| Endogenous | GZMK     | NM_002104.2    |
| Endogenous | HAVCR2   | NM_032782.3    |
| Endogenous | HCK      | NM_001172129.1 |
| Endogenous | HEPACAM  | NM_152722.4    |
| Endogenous | HGF      | NM_000601.4    |
| Endogenous | HLA-A    | NM_002116.6    |
| Endogenous | HLA-B    | NM_005514.6    |
| Endogenous | HLA-C    | NM_002117.4    |
| Endogenous | HLA-DMA  | NM_006120.3    |
| Endogenous | HLA-DMB  | NM_002118.3    |
| Endogenous | HLA-DOA  | NM_002119.3    |
| Endogenous | HLA-DOB  | NM_002120.3    |
| Endogenous | HLA-DPA1 | NM_033554.2    |
| Endogenous | HLA-DPB1 | NM_002121.4    |
| Endogenous | HLA-DQA1 | NM_002122.3    |
| Endogenous | HLA-DQA2 | NM_020056.3    |
| Endogenous | HLA-DQB1 | NM_002123.2    |
| Endogenous | HLA-DRA  | NM_019111.4    |
| Endogenous | HLA-DRB1 | NM_002124.1    |
| Endogenous | HLA-E    | NM_005516.4    |
| Endogenous | HLA-F    | NM_001098479.1 |
| Endogenous | HLA-G    | NM_002127.4    |
| Endogenous | HLA-H    | NR_001434.2    |

|            |          |                |
|------------|----------|----------------|
| Endogenous | HPRT1    | NM_000194.2    |
| Endogenous | HSP90AA1 | NM_005348.3    |
| Endogenous | HSPA1A   | NM_005345.5    |
| Endogenous | ICAM1    | NM_000201.1    |
| Endogenous | ICAM2    | NM_000873.3    |
| Endogenous | ICAM3    | NM_002162.3    |
| Endogenous | ICAM4    | NM_001544.3    |
| Endogenous | ICAM5    | NM_003259.3    |
| Endogenous | ICOS     | NM_012092.2    |
| Endogenous | ICOSLG   | NM_015259.4    |
| Endogenous | IDH1     | NM_005896.3    |
| Endogenous | IDH3A    | NM_005530.2    |
| Endogenous | IDO1     | NM_002164.3    |
| Endogenous | IER3     | NM_003897.2    |
| Endogenous | IFI30    | NM_006332.3    |
| Endogenous | IFIH1    | NM_022168.2    |
| Endogenous | IFIT1    | NM_001548.3    |
| Endogenous | IFIT1B   | NM_001010987.1 |
| Endogenous | IFIT2    | NM_001547.4    |
| Endogenous | IFIT3    | NM_001031683.2 |
| Endogenous | IFITM1   | NM_003641.3    |
| Endogenous | IFNA1    | NM_024013.1    |
| Endogenous | IFNA10   | NM_002171.1    |
| Endogenous | IFNA14   | NM_002172.2    |
| Endogenous | IFNA16   | NM_002173.2    |
| Endogenous | IFNA2    | NM_000605.3    |
| Endogenous | IFNA21   | NM_002175.2    |
| Endogenous | IFNA5    | NM_002169.1    |
| Endogenous | IFNA6    | NM_021002.1    |
| Endogenous | IFNA7    | NM_021057.2    |
| Endogenous | IFNAR1   | NM_000629.2    |
| Endogenous | IFNAR2   | NM_000874.3    |
| Endogenous | IFNB1    | NM_002176.2    |
| Endogenous | IFNE     | NM_176891.4    |
| Endogenous | IFNG     | NM_000619.2    |
| Endogenous | IFNGR1   | NM_000416.1    |
| Endogenous | IFNGR2   | NM_005534.3    |
| Endogenous | IFNK     | NM_020124.2    |
| Endogenous | IFNL1    | NM_172140.1    |
| Endogenous | IFNL2    | NM_172138.1    |
| Endogenous | IFNLR1   | NM_173065.1    |
| Endogenous | IFNW1    | NM_002177.1    |
| Endogenous | IGF1R    | NM_000875.3    |
| Endogenous | IGF2R    | NM_000876.1    |
| Endogenous | IKBKB    | NM_001556.1    |
| Endogenous | IKBKE    | NM_014002.2    |

|            |         |                |
|------------|---------|----------------|
| Endogenous | IKBKG   | NM_001099857.1 |
| Endogenous | IKZF1   | NM_006060.3    |
| Endogenous | IL10    | NM_000572.2    |
| Endogenous | IL10RA  | NM_001558.2    |
| Endogenous | IL10RB  | NM_000628.3    |
| Endogenous | IL11    | NM_000641.2    |
| Endogenous | IL11RA  | NM_147162.1    |
| Endogenous | IL12A   | NM_000882.2    |
| Endogenous | IL12B   | NM_002187.2    |
| Endogenous | IL12RB1 | NM_005535.1    |
| Endogenous | IL12RB2 | NM_001559.2    |
| Endogenous | IL13    | NM_002188.2    |
| Endogenous | IL13RA1 | NM_001560.2    |
| Endogenous | IL13RA2 | NM_000640.2    |
| Endogenous | IL15    | NM_172174.1    |
| Endogenous | IL15RA  | NM_002189.2    |
| Endogenous | IL16    | NM_004513.4    |
| Endogenous | IL17C   | NM_013278.3    |
| Endogenous | IL17D   | NM_138284.1    |
| Endogenous | IL17F   | NM_052872.3    |
| Endogenous | IL17RA  | NM_014339.4    |
| Endogenous | IL17RC  | NM_153461.2    |
| Endogenous | IL17RD  | NM_017563.3    |
| Endogenous | IL17RE  | NM_153483.1    |
| Endogenous | IL18    | NM_001562.2    |
| Endogenous | IL18BP  | NM_001039659.1 |
| Endogenous | IL18R1  | NM_003855.2    |
| Endogenous | IL18RAP | NM_003853.2    |
| Endogenous | IL1A    | NM_000575.3    |
| Endogenous | IL1B    | NM_000576.2    |
| Endogenous | IL1F10  | NM_032556.4    |
| Endogenous | IL1R1   | NM_000877.2    |
| Endogenous | IL1R2   | NM_173343.1    |
| Endogenous | IL1RAP  | NM_002182.2    |
| Endogenous | IL1RL1  | NM_016232.4    |
| Endogenous | IL1RL2  | NM_003854.2    |
| Endogenous | IL1RN   | NM_173841.1    |
| Endogenous | IL2     | NM_000586.3    |
| Endogenous | IL20    | NM_018724.3    |
| Endogenous | IL20RA  | NM_014432.2    |
| Endogenous | IL20RB  | NM_144717.2    |
| Endogenous | IL21    | NM_021803.2    |
| Endogenous | IL21R   | NM_181078.1    |
| Endogenous | IL22    | NM_020525.4    |
| Endogenous | IL22RA1 | NM_021258.2    |
| Endogenous | IL23A   | NM_016584.2    |

|            |        |                |
|------------|--------|----------------|
| Endogenous | IL23R  | NM_144701.2    |
| Endogenous | IL24   | NM_001185158.1 |
| Endogenous | IL25   | NM_022789.2    |
| Endogenous | IL26   | NM_018402.1    |
| Endogenous | IL27   | NM_145659.3    |
| Endogenous | IL27RA | NM_004843.2    |
| Endogenous | IL2RA  | NM_000417.1    |
| Endogenous | IL2RB  | NM_000878.2    |
| Endogenous | IL2RG  | NM_000206.1    |
| Endogenous | IL3    | NM_000588.3    |
| Endogenous | IL31   | NM_001014336.1 |
| Endogenous | IL31RA | NM_139017.3    |
| Endogenous | IL32   | NM_001012633.1 |
| Endogenous | IL33   | NM_033439.2    |
| Endogenous | IL34   | NM_152456.1    |
| Endogenous | IL36A  | NM_014440.1    |
| Endogenous | IL36B  | NM_014438.3    |
| Endogenous | IL36G  | NM_019618.2    |
| Endogenous | IL36RN | NM_012275.2    |
| Endogenous | IL37   | NM_014439.3    |
| Endogenous | IL3RA  | NM_002183.2    |
| Endogenous | IL4R   | NM_000418.2    |
| Endogenous | IL5    | NM_000879.2    |
| Endogenous | IL5RA  | NM_000564.3    |
| Endogenous | IL6    | NM_000600.3    |
| Endogenous | IL6R   | NM_000565.2    |
| Endogenous | IL6ST  | NM_001190981.1 |
| Endogenous | IL7    | NM_000880.2    |
| Endogenous | IL7R   | NM_002185.2    |
| Endogenous | IL9    | NM_000590.1    |
| Endogenous | IL9R   | NM_002186.2    |
| Endogenous | INSR   | NM_000208.1    |
| Endogenous | IRAK1  | NM_001569.3    |
| Endogenous | IRAK3  | NM_007199.1    |
| Endogenous | IREB2  | NM_004136.1    |
| Endogenous | IRF1   | NM_002198.1    |
| Endogenous | IRF2   | NM_002199.2    |
| Endogenous | IRF3   | NM_001571.5    |
| Endogenous | IRF4   | NM_001195286.1 |
| Endogenous | IRF5   | NM_002200.3    |
| Endogenous | IRF6   | NM_006147.2    |
| Endogenous | IRF7   | NM_004031.2    |
| Endogenous | IRF8   | NM_002163.2    |
| Endogenous | IRF9   | NM_006084.4    |
| Endogenous | ITGAE  | NM_002208.4    |
| Endogenous | ITGAL  | NM_002209.2    |

|            |         |                |
|------------|---------|----------------|
| Endogenous | ITGAM   | NM_000632.3    |
| Endogenous | ITGAV   | NM_002210.2    |
| Endogenous | ITGAX   | NM_000887.3    |
| Endogenous | ITGB2   | NM_000211.2    |
| Endogenous | ITK     | NM_005546.3    |
| Endogenous | JAM2    | NM_021219.2    |
| Endogenous | JAM3    | NM_032801.3    |
| Endogenous | KAL1    | NM_000216.2    |
| Endogenous | KDR     | NM_002253.2    |
| Endogenous | KIT     | NM_000222.2    |
| Endogenous | KLF4    | NM_004235.4    |
| Endogenous | L1CAM   | NM_000425.3    |
| Endogenous | LAG3    | NM_002286.5    |
| Endogenous | LBP     | NM_004139.2    |
| Endogenous | LCK     | NM_005356.3    |
| Endogenous | LCP2    | NM_005565.3    |
| Endogenous | LDHA    | NM_001165414.1 |
| Endogenous | LEP     | NM_000230.2    |
| Endogenous | LEPR    | NM_001003679.1 |
| Endogenous | LIFR    | NM_001127671.1 |
| Endogenous | LILRB3  | NM_006864.2    |
| Endogenous | LIMS1   | NM_004987.3    |
| Endogenous | LMBR1   | NM_022458.3    |
| Endogenous | LPA     | NM_005577.2    |
| Endogenous | LRP1    | NM_002332.2    |
| Endogenous | LRRK1   | NM_024652.2    |
| Endogenous | LRRK2   | NM_198578.2    |
| Endogenous | LTA     | NM_001159740.1 |
| Endogenous | LTBP1   | NM_000627.3    |
| Endogenous | LTBR    | NM_002342.1    |
| Endogenous | LUM     | NM_002345.3    |
| Endogenous | LY6G    | XM_001475753.3 |
| Endogenous | LY75    | NM_002349.2    |
| Endogenous | LY96    | NM_015364.2    |
| Endogenous | MADCAM1 | NM_130761.1    |
| Endogenous | MAFF    | NM_001161572.1 |
| Endogenous | MALT1   | NM_006785.2    |
| Endogenous | MAP3K14 | NM_003954.1    |
| Endogenous | MAP3K8  | NM_005204.2    |
| Endogenous | MARCO   | NM_006770.3    |
| Endogenous | MCAM    | NM_006500.2    |
| Endogenous | MET     | NM_001127500.1 |
| Endogenous | MIA     | NM_006533.1    |
| Endogenous | MICA    | NM_000247.1    |
| Endogenous | MICB    | NM_005931.3    |
| Endogenous | MIEF1   | NM_019008.4    |

|            |         |                |
|------------|---------|----------------|
| Endogenous | MIF     | NM_002415.1    |
| Endogenous | MITF    | NM_000248.3    |
| Endogenous | MLNR    | NM_001507.1    |
| Endogenous | MMD2    | NM_198403.3    |
| Endogenous | MMP1    | NM_002421.2    |
| Endogenous | MMP11   | NM_005940.3    |
| Endogenous | MMP12   | NM_002426.3    |
| Endogenous | MMP13   | NM_002427.3    |
| Endogenous | MMP14   | NM_004995.2    |
| Endogenous | MMP15   | NM_002428.2    |
| Endogenous | MMP19   | NM_002429.4    |
| Endogenous | MMP2    | NM_001127891.1 |
| Endogenous | MMP20   | NM_004771.3    |
| Endogenous | MMP21   | NM_147191.1    |
| Endogenous | MMP28   | NM_001032278.1 |
| Endogenous | MMP3    | NM_002422.3    |
| Endogenous | MMP7    | NM_002423.3    |
| Endogenous | MMP8    | NM_002424.2    |
| Endogenous | MMP9    | NM_004994.2    |
| Endogenous | MPL     | NM_005373.2    |
| Endogenous | MR1     | NM_001531.2    |
| Endogenous | MSR1    | NM_138715.2    |
| Endogenous | MUC4    | NM_018406.4    |
| Endogenous | MUC5AC  | XM_003403450.1 |
| Endogenous | MYD88   | NM_001172567.1 |
| Endogenous | NAIP    | NM_004536.2    |
| Endogenous | NCAM1   | NM_181351.3    |
| Endogenous | NCAM2   | NM_004540.2    |
| Endogenous | NCAN    | NM_004386.2    |
| Endogenous | NCR1    | NM_001242357.1 |
| Endogenous | NDUFS3  | NM_004551.1    |
| Endogenous | NFAT5   | NM_173214.1    |
| Endogenous | NFATC1  | NM_172387.1    |
| Endogenous | NFATC2  | NM_173091.2    |
| Endogenous | NFATC3  | NM_173164.1    |
| Endogenous | NFATC4  | NM_004554.4    |
| Endogenous | NFKB1   | NM_001165412.1 |
| Endogenous | NFKBIA  | NM_020529.1    |
| Endogenous | NFKBIB  | NM_002503.3    |
| Endogenous | NFKBIE  | NM_004556.2    |
| Endogenous | NFKBIZ  | NM_001005474.1 |
| Endogenous | NFYA    | NM_002505.3    |
| Endogenous | NFYB    | NM_006166.3    |
| Endogenous | NFYC    | NM_001142587.1 |
| Endogenous | NKIRAS1 | NM_020345.3    |
| Endogenous | NKIRAS2 | NM_001144927.1 |

|            |          |                |
|------------|----------|----------------|
| Endogenous | NKRF     | NM_001173488.1 |
| Endogenous | NLRC3    | NM_178844.2    |
| Endogenous | NLRC4    | NM_021209.3    |
| Endogenous | NLRP1    | NM_033004.2    |
| Endogenous | NLRP10   | NM_176821.3    |
| Endogenous | NLRP12   | NM_033297.2    |
| Endogenous | NLRP13   | NM_176810.2    |
| Endogenous | NLRP2    | NM_017852.1    |
| Endogenous | NLRP3    | NM_004895.4    |
| Endogenous | NLRP4    | NM_134444.4    |
| Endogenous | NLRP6    | NM_138329.1    |
| Endogenous | NLRP7    | NM_139176.3    |
| Endogenous | NLRP8    | NM_176811.2    |
| Endogenous | NLRP9    | NM_176820.2    |
| Endogenous | NOD1     | NM_006092.1    |
| Endogenous | NOD2     | NM_022162.1    |
| Endogenous | NOS1     | NM_000620.4    |
| Endogenous | NOS2     | NM_000625.4    |
| Endogenous | NOTCH1   | NM_017617.3    |
| Endogenous | NOTCH2   | NM_024408.3    |
| Endogenous | NRCAM    | NM_001037132.1 |
| Endogenous | NRP1     | NM_001024629.2 |
| Endogenous | NRP2     | NM_003872.2    |
| Endogenous | OGDHL    | NM_018245.2    |
| Endogenous | OGFR     | NM_007346.2    |
| Endogenous | OLR1     | NM_002543.3    |
| Endogenous | P4HA1    | NM_000917.3    |
| Endogenous | P4HA2    | NM_004199.2    |
| Endogenous | P4HB     | NM_000918.3    |
| Endogenous | PDCD1    | NM_005018.1    |
| Endogenous | PDCD1LG2 | NM_025239.3    |
| Endogenous | PDGFRA   | NM_006206.4    |
| Endogenous | PDGFRB   | NM_002609.3    |
| Endogenous | PDIA2    | NM_006849.2    |
| Endogenous | PDIA3    | NM_005313.4    |
| Endogenous | PECAM1   | NM_000442.3    |
| Endogenous | PGK1     | NM_000291.2    |
| Endogenous | PGLYRP1  | NM_005091.1    |
| Endogenous | PGLYRP2  | NM_052890.3    |
| Endogenous | PGLYRP3  | NM_052891.1    |
| Endogenous | PGLYRP4  | NM_020393.2    |
| Endogenous | PJA1     | NM_001032396.2 |
| Endogenous | PLA2G2A  | NM_000300.2    |
| Endogenous | PLAU     | NM_002658.3    |
| Endogenous | PLAUR    | NM_002659.2    |
| Endogenous | PLOD1    | NM_000302.2    |

|            |          |                |
|------------|----------|----------------|
| Endogenous | PLOD2    | NM_182943.2    |
| Endogenous | PLOD3    | NM_001084.4    |
| Endogenous | POLR1B   | NM_019014.4    |
| Endogenous | POLR2A   | NM_000937.4    |
| Endogenous | PPARG    | NM_015869.3    |
| Endogenous | PPARGC1A | NM_013261.3    |
| Endogenous | PPBP     | NM_002704.2    |
| Endogenous | PPIA     | NM_021130.2    |
| Endogenous | PRF1     | NM_005041.3    |
| Endogenous | PRKRIR   | NM_004705.2    |
| Endogenous | PROCR    | NM_006404.3    |
| Endogenous | PSMB10   | NM_002801.2    |
| Endogenous | PSMB8    | NM_004159.4    |
| Endogenous | PSMB9    | NM_002800.4    |
| Endogenous | PSME1    | NM_006263.2    |
| Endogenous | PSME2    | NM_002818.2    |
| Endogenous | PSME3    | NM_005789.2    |
| Endogenous | PTAFR    | NM_000952.3    |
| Endogenous | PTEN     | NM_000314.4    |
| Endogenous | PTGS2    | NM_000963.1    |
| Endogenous | PTK2     | NM_005607.3    |
| Endogenous | PTPRC    | NM_080923.2    |
| Endogenous | PTX3     | NM_002852.3    |
| Endogenous | PYCARD   | NM_013258.3    |
| Endogenous | PYDC1    | NM_152901.2    |
| Endogenous | RAC2     | NM_002872.3    |
| Endogenous | RARA     | NM_001033603.1 |
| Endogenous | RARB     | NM_000965.3    |
| Endogenous | RARG     | NM_000966.3    |
| Endogenous | RARRES3  | NM_004585.3    |
| Endogenous | RBP5     | NM_031491.2    |
| Endogenous | REG3G    | NM_198448.2    |
| Endogenous | RELA     | NM_001145138.1 |
| Endogenous | RELB     | NM_006509.2    |
| Endogenous | RFX5     | NM_000449.3    |
| Endogenous | ROBO1    | NM_002941.2    |
| Endogenous | ROBO2    | NM_001128929.1 |
| Endogenous | ROBO3    | NM_022370.2    |
| Endogenous | RPL19    | NM_000981.3    |
| Endogenous | RPLP0    | NM_001002.3    |
| Endogenous | RUNX3    | NM_001031680.2 |
| Endogenous | RXFP1    | NM_021634.2    |
| Endogenous | S100A1   | NM_006271.1    |
| Endogenous | S100A10  | NM_002966.1    |
| Endogenous | S100A11  | NM_005620.1    |
| Endogenous | S100A12  | NM_005621.1    |

|            |          |                |
|------------|----------|----------------|
| Endogenous | S100A13  | NM_001024210.1 |
| Endogenous | S100A14  | NM_020672.1    |
| Endogenous | S100A2   | NM_005978.3    |
| Endogenous | S100A3   | NM_002960.1    |
| Endogenous | S100A5   | NM_002962.1    |
| Endogenous | S100A6   | NM_014624.3    |
| Endogenous | S100A7   | NM_002963.2    |
| Endogenous | S100A7A  | NM_176823.3    |
| Endogenous | S100A7L2 | NM_001045479.1 |
| Endogenous | S100A8   | NM_002964.3    |
| Endogenous | S100A9   | NM_002965.2    |
| Endogenous | S100B    | NM_006272.1    |
| Endogenous | S100P    | NM_005980.2    |
| Endogenous | S100Z    | NM_130772.3    |
| Endogenous | S1PR1    | NM_001400.3    |
| Endogenous | S1PR2    | NM_004230.3    |
| Endogenous | SAA1     | NM_199161.1    |
| Endogenous | SAA2     | NM_030754.3    |
| Endogenous | SDC1     | NM_002997.4    |
| Endogenous | SDC2     | NM_002998.3    |
| Endogenous | SDC3     | NM_014654.3    |
| Endogenous | SDC4     | NM_002999.2    |
| Endogenous | SDHA     | NM_004168.2    |
| Endogenous | SDK1     | NM_001079653.1 |
| Endogenous | SELL     | NR_029467.1    |
| Endogenous | SELP     | NM_003005.2    |
| Endogenous | SEMA3A   | NM_006080.1    |
| Endogenous | SEMA3B   | NM_001005914.1 |
| Endogenous | SEMA3C   | NM_006379.2    |
| Endogenous | SEMA3D   | NM_152754.2    |
| Endogenous | SEMA3E   | NM_012431.1    |
| Endogenous | SEMA3F   | NM_004186.3    |
| Endogenous | SEMA3G   | NM_020163.1    |
| Endogenous | SEMA4A   | NM_001193300.1 |
| Endogenous | SEMA4B   | NM_020210.3    |
| Endogenous | SEMA4C   | NM_017789.4    |
| Endogenous | SEMA4D   | NM_001142287.1 |
| Endogenous | SEMA4F   | NM_004263.3    |
| Endogenous | SEMA4G   | NM_001203244.1 |
| Endogenous | SEMA5A   | NM_003966.2    |
| Endogenous | SEMA5B   | NM_001031702.2 |
| Endogenous | SEMA6A   | NM_020796.3    |
| Endogenous | SEMA6B   | NM_032108.3    |
| Endogenous | SEMA6C   | NM_030913.4    |
| Endogenous | SEMA6D   | NM_153617.1    |
| Endogenous | SEMA7A   | NM_001146029.1 |

|            |          |                |
|------------|----------|----------------|
| Endogenous | SHFM1    | NM_006304.1    |
| Endogenous | SIGLEC14 | NM_001098612.1 |
| Endogenous | SIX2     | NM_016932.4    |
| Endogenous | SKIV2L   | NM_006929.4    |
| Endogenous | SLAMF1   | NM_003037.2    |
| Endogenous | SLAMF6   | NM_001184714.1 |
| Endogenous | SLAMF7   | NM_021181.3    |
| Endogenous | SLIT1    | NM_003061.2    |
| Endogenous | SLIT2    | NM_004787.1    |
| Endogenous | SLPI     | NM_003064.2    |
| Endogenous | SMAD3    | NM_005902.3    |
| Endogenous | SMAGP    | NM_001033873.1 |
| Endogenous | SMURF2   | NM_022739.3    |
| Endogenous | SOCS1    | NM_003745.1    |
| Endogenous | SOCS3    | NM_003955.3    |
| Endogenous | SOD1     | NM_000454.4    |
| Endogenous | SORT1    | NM_002959.4    |
| Endogenous | SP1      | NM_003109.1    |
| Endogenous | SPI1     | NM_001080547.1 |
| Endogenous | SPN      | NM_003123.3    |
| Endogenous | SPRY2    | NM_005842.2    |
| Endogenous | SPRY4    | NM_030964.3    |
| Endogenous | SSTR1    | NM_001049.2    |
| Endogenous | SSTR2    | NM_001050.2    |
| Endogenous | STAT1    | NM_007315.3    |
| Endogenous | STAT3    | NM_213662.1    |
| Endogenous | SYK      | NM_003177.5    |
| Endogenous | TACR1    | NM_015727.1    |
| Endogenous | TANK     | NM_004180.2    |
| Endogenous | TAP1     | NM_000593.5    |
| Endogenous | TAP2     | NM_000544.3    |
| Endogenous | TAPBP    | NM_003190.4    |
| Endogenous | TAPBPL   | NM_018009.4    |
| Endogenous | TBP      | NM_001172085.1 |
| Endogenous | TCF4     | NM_001083962.1 |
| Endogenous | TCF7L2   | NM_030756.3    |
| Endogenous | TEC      | NM_003215.1    |
| Endogenous | TEK      | NM_000459.2    |
| Endogenous | TGFB1    | NM_000660.4    |
| Endogenous | TGFBR1   | NM_001130916.1 |
| Endogenous | TGFBR2   | NM_003242.5    |
| Endogenous | TGFBR3   | NM_003243.3    |
| Endogenous | THBS1    | NM_003246.2    |
| Endogenous | THRA     | NM_199334.2    |
| Endogenous | THRB     | NM_000461.4    |
| Endogenous | TICAM1   | NM_014261.1    |

|            |           |             |
|------------|-----------|-------------|
| Endogenous | TICAM2    | NM_021649.4 |
| Endogenous | TIE1      | NM_005424.2 |
| Endogenous | TIMP1     | NM_003254.2 |
| Endogenous | TIMP2     | NM_003255.4 |
| Endogenous | TIMP3     | NM_000362.4 |
| Endogenous | TIMP4     | NM_003256.2 |
| Endogenous | TK2       | NM_004614.3 |
| Endogenous | TLR1      | NM_003263.3 |
| Endogenous | TLR10     | NM_030956.2 |
| Endogenous | TLR2      | NM_003264.3 |
| Endogenous | TLR3      | NM_003265.2 |
| Endogenous | TLR4      | NM_138554.2 |
| Endogenous | TLR5      | NM_003268.3 |
| Endogenous | TLR6      | NM_006068.2 |
| Endogenous | TLR7      | NM_016562.3 |
| Endogenous | TLR8      | NM_016610.2 |
| Endogenous | TLR9      | NM_017442.2 |
| Endogenous | TNF       | NM_000594.2 |
| Endogenous | TNFAIP3   | NM_006290.2 |
| Endogenous | TNFRSF10A | NM_003844.2 |
| Endogenous | TNFRSF10B | NM_147187.1 |
| Endogenous | TNFRSF10C | NM_003841.2 |
| Endogenous | TNFRSF10D | NM_003840.3 |
| Endogenous | TNFRSF11A | NM_003839.2 |
| Endogenous | TNFRSF11B | NM_002546.3 |
| Endogenous | TNFRSF12A | NM_016639.1 |
| Endogenous | TNFRSF13B | NM_012452.2 |
| Endogenous | TNFRSF13C | NM_052945.3 |
| Endogenous | TNFRSF14  | NM_003820.2 |
| Endogenous | TNFRSF17  | NM_001192.2 |
| Endogenous | TNFRSF18  | NM_148901.1 |
| Endogenous | TNFRSF19  | NM_018647.3 |
| Endogenous | TNFRSF1A  | NM_001065.3 |
| Endogenous | TNFRSF1B  | NM_001066.2 |
| Endogenous | TNFRSF21  | NM_014452.3 |
| Endogenous | TNFRSF25  | NM_148970.1 |
| Endogenous | TNFRSF4   | NM_003327.2 |
| Endogenous | TNFRSF6B  | NM_003823.2 |
| Endogenous | TNFRSF8   | NM_001243.3 |
| Endogenous | TNFRSF9   | NM_001561.4 |
| Endogenous | TNFSF10   | NR_033994.1 |
| Endogenous | TNFSF11   | NM_003701.2 |
| Endogenous | TNFSF12   | NM_003809.2 |
| Endogenous | TNFSF13   | NM_003808.2 |
| Endogenous | TNFSF13B  | NM_006573.4 |
| Endogenous | TNFSF14   | NM_003807.2 |

|            |         |                |
|------------|---------|----------------|
| Endogenous | TNFSF15 | NM_005118.2    |
| Endogenous | TNFSF18 | NM_005092.2    |
| Endogenous | TNFSF4  | NM_003326.2    |
| Endogenous | TNFSF8  | NM_001244.2    |
| Endogenous | TNFSF9  | NM_003811.3    |
| Endogenous | TP53    | NM_000546.2    |
| Endogenous | TRAF3   | NM_145725.2    |
| Endogenous | TRIM22  | NM_006074.4    |
| Endogenous | TRIM27  | NM_006510.4    |
| Endogenous | TRIM46  | NM_025058.3    |
| Endogenous | TRIM5   | NM_033093.1    |
| Endogenous | TRIM69  | NM_080745.3    |
| Endogenous | TRPC4AP | NM_015638.2    |
| Endogenous | TUBB    | NM_178014.2    |
| Endogenous | UBR1    | NM_174916.2    |
| Endogenous | UBXN1   | NM_015853.3    |
| Endogenous | ULBP1   | NM_025218.2    |
| Endogenous | ULBP2   | NM_025217.2    |
| Endogenous | VCAM1   | NM_001078.3    |
| Endogenous | VCAN    | NM_004385.3    |
| Endogenous | VEGFA   | NM_001025366.1 |
| Endogenous | VIM     | NM_003380.3    |
| Endogenous | VTN     | NM_000638.3    |
| Endogenous | WNT5A   | NM_003392.3    |
| Endogenous | XBP1    | NM_005080.2    |
| Endogenous | XCL1    | NM_002995.1    |
| Endogenous | XCR1    | NM_005283.2    |
| Endogenous | ZAP70   | NM_001079.3    |
| Endogenous | ZC3HAV1 | NM_020119.3    |
