# Supplementary material for: Sustained Type I interferon signaling as a mechanism of resistance to PD-1 blockade
Source: PubMed Central journal article supplement (PMC6796942; doi:10.1038/s41422-019-0224-x), 2019-09-03
Supplement: 41422_2019_224_MOESM15_ESM.pdf [file 41422_2019_224_MOESM15_ESM.pdf]

Table S4: Antibodies

| <b>Abs</b>    | <b>Color</b> | <b>Clone</b> | <b>Isotype</b>        | <b>Company</b> | <b>Ref</b> |
|---------------|--------------|--------------|-----------------------|----------------|------------|
| Arg1          | APC          | Polyclonal   | Sheep IgG             | R&D            | IC5868A    |
| CD11b         | PB           | M1/70        | Rat IgG2b             | Biologend      | 101224     |
| CD11c         | PC7          | N418         | Armenian Hamster IgG  | Biologend      | 117318     |
| CD11c         | BV421        | N418         | Armenian Hamster IgG  | Biologend      | 117330     |
| CD3           | PC7          | 145-2C11     |                       | BD             | 552774     |
| CD4           | PB           | GK1.5        |                       | Biologend      | 100428     |
| CD4           | PE           | GK1.5        |                       | BD             | 553730     |
| CD45.2        | PerCP Cy5.5  | 104          |                       | eBiosciences   | 45-0454-82 |
| CD80          | PE           | 16-10A1      | Armenian Hamster IgG2 | BD             | 553769     |
| CD86          | APC          | GL1          | Rat IgG2a             | BD             | 558703     |
| CD8a          | APC Cy7      | 53-6.7       |                       | BD             | 557654     |
| CD8a          | PerCp        | 53-6.7       |                       | BD             | 553036     |
| CD8a          | FITC         | 53-6.7       |                       | BD             | 553031     |
| F4/80         | APC-Cy7      | BM8          | Rat IgG2a             | Biologend      | 123118     |
| Foxp3         | APC          | FJK-16s      | Rat IgG2a             | eBiosciences   | 17-5773-82 |
| Gr1           | Pe-Cy7       | RB6-8C5      | Rat IgG2b             | eBiosciences   | 25-5931-82 |
| H-2Kb         | FITC         | AF6-120.1    | Mouse IgG2a           | BD             | 553551     |
| I-A/I-E       | APC          | M5/114.15.2  | Rat IgG2b             | Biologend      | 107614     |
| I-A/I-E       | PE           | M5/114.15.2  | Rat IgG2b             | eBiosciences   | 12-5321-82 |
| ICOS          | FITC         | 7E.1769      | Armenian Hamster IgG  | eBiosciences   | 11-9942-82 |
| IFNAR 1       | APC          | MAR1-5A3     | Rat IgG2b             | Biologend      | 127314     |
| IFN $\gamma$  | PerCP Cy5.5  | XMG1.2       | Rat IgG1k             | eBiosciences   | 45-7311-82 |
| IL-17A        | APC          | eBio17B7     | Rat IgG2ak            | eBiosciences   | 17-7177-81 |
| Ki67          | PE           | B56          | Mouse IgG1            | BD             | 556027     |
| Ki67          | FITC         | B56          | Mouse IgG1            | BD             | 556026     |
| Ly6C          | APC Cy7      | AL-21        | Rat IgM               | BD             | 560596     |
| Ly6G          | FITC         | 1A8          | Rat LEW               | BD             | 551460     |
| Nos2          | PE           | CXNFT        | Rat IgG2a             | eBiosciences   | 12-5920-82 |
| PD-1          | FITC         | J43          | Armenian Hamster IgG  | eBiosciences   | 11-9985-85 |
| PD-1          | APC          | J43          | Armenian Hamster IgG  | eBiosciences   | 17-9985-82 |
| PD-L1         | PE           | MIH5         | Rat IgG2a             | eBiosciences   | 12-5982-82 |
| PD-L1         | BV421        | MIH5         | Rat IgG2a             | BD             | 564716     |
| PD-L1         | Pe-Cy7       | MIH5         | Rat IgG2a             | eBiosciences   | 25-5982-82 |
| TNF $\alpha$  | PE           | MP6-XT22     | Rat IgG1k             | eBiosciences   | 12-7321-82 |
| Viability Dye |              |              |                       | Invitrogen     | L-34960    |
